# Supplementary material
Source: PubMed Central journal article supplement (PMC5883631)
Supplement: mmc1.pdf [file mmc1.pdf]

**Biophysical Journal, Volume 114**

**Supplemental Information**

**Hexahydrated  $Mg^{2+}$  Binding and Outer-Shell Dehydration on RNA  
Surface**

**Tao Yu and Shi-Jie Chen**

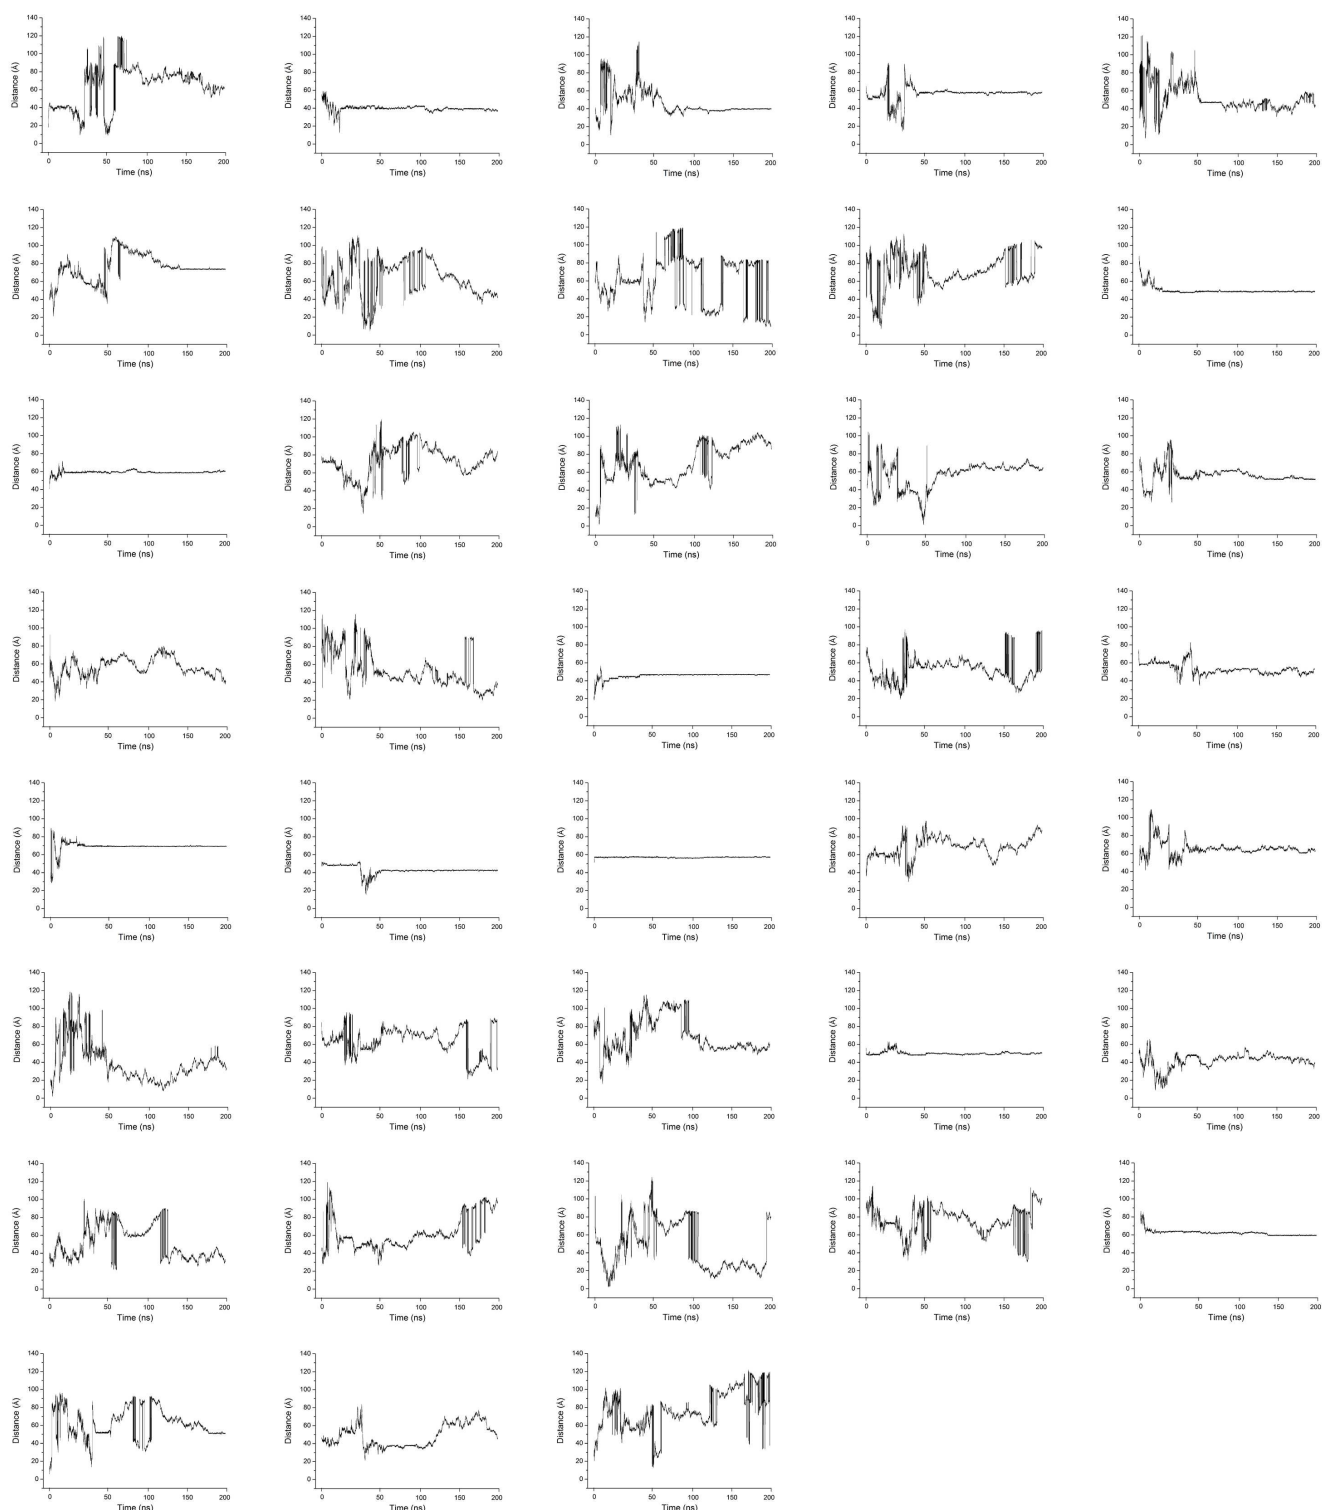

Figure S1: Coordinate variations (relative to the initial coordinates) of all the 38  $Mg^{2+}$  ions in tRNA-water-ion solution system during a 200 ns MD simulation. Small coordinate variation indicates  $Mg^{2+}$  ion binding to the tRNA surface.

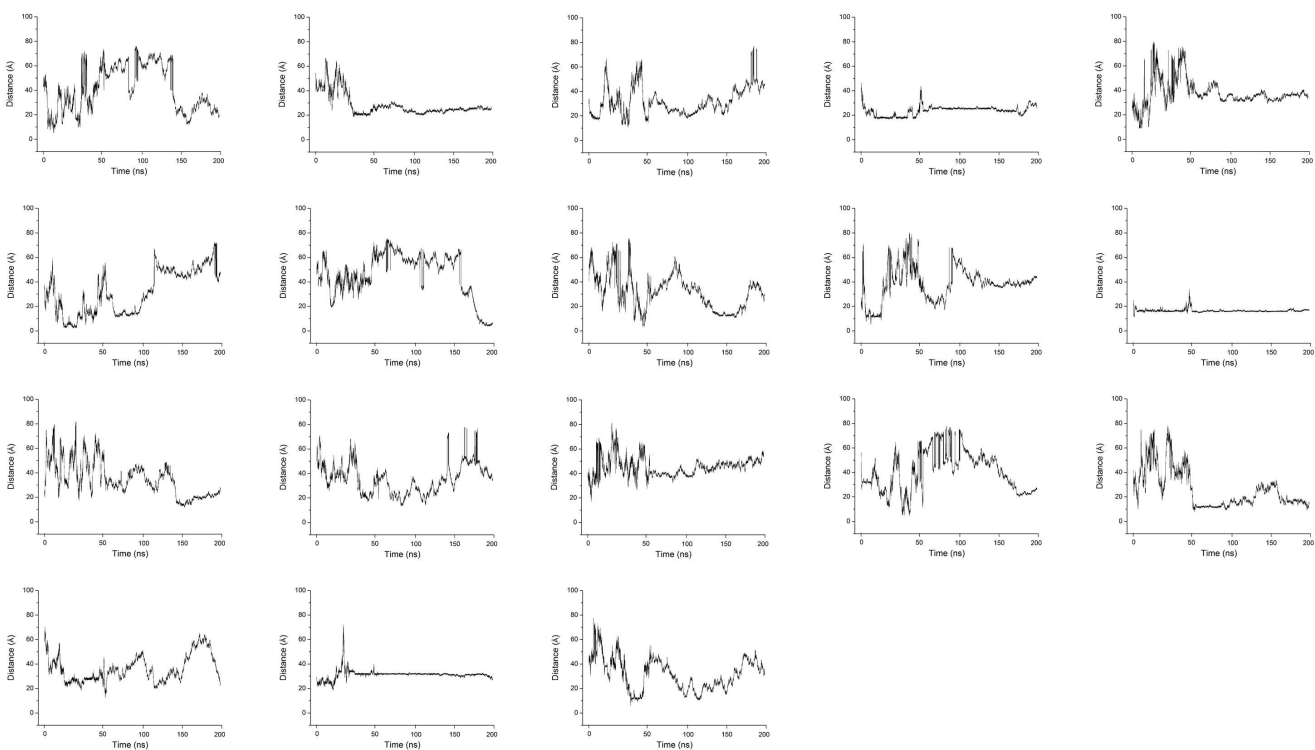

Figure S2: Coordinate variations (relative to the initial coordinates) of all 18  $Mg^{2+}$  ions in mRNA-water-ion solution system during 200 ns MD simulation. Small coordinate variation indicates  $Mg^{2+}$  ion binding to the mRNA surface.

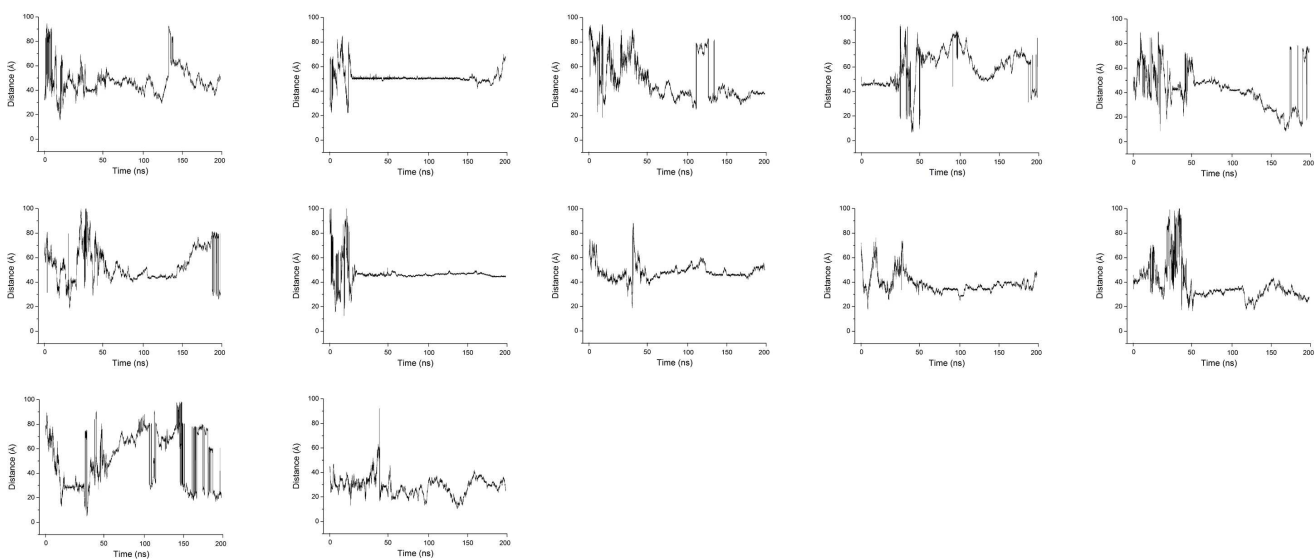

Figure S3: Coordinate variations of all the 12  $Mg^{2+}$  ions in the BWYV RNA-water-ion solution system during the 200 ns MD simulation. Small coordinate variation indicates  $Mg^{2+}$  ion binding to the BWYV RNA surface.

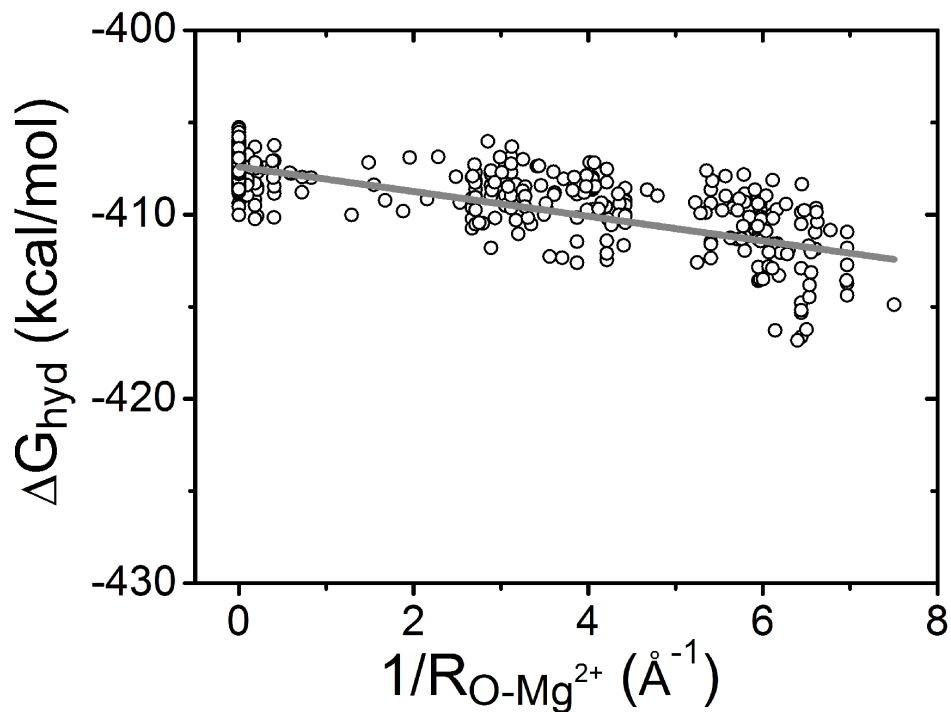

Figure S4: Relationship between the hydration free energy  $\Delta G_{hyd}$  and  $1/R_{O-Mg^{2+}}$  values of mRNA structure. The gray line is fitted by equation:  $\Delta G_{hyd} = -0.67/R_{O-Mg^{2+}} - 407.41$ .

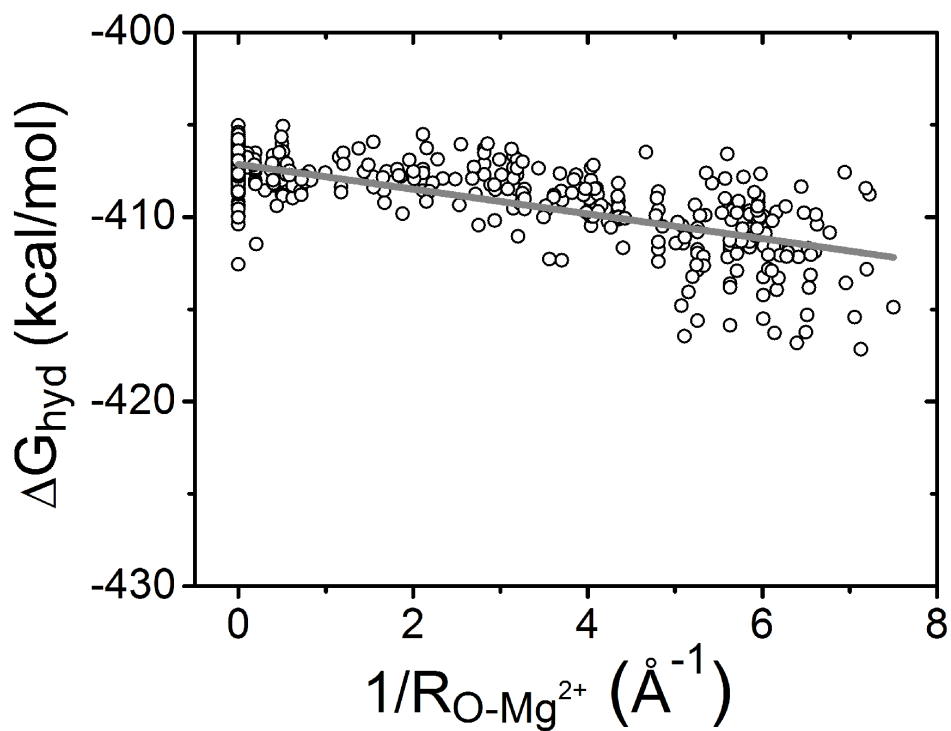

Figure S5: Relationship between the hydration free energy  $\Delta G_{hyd}$  and  $1/R_{O-Mg^{2+}}$  values of BWYV RNA structure. The gray line is fitted by equation:  $\Delta G_{hyd} = -0.67/R_{O-Mg^{2+}} - 407.26$ .

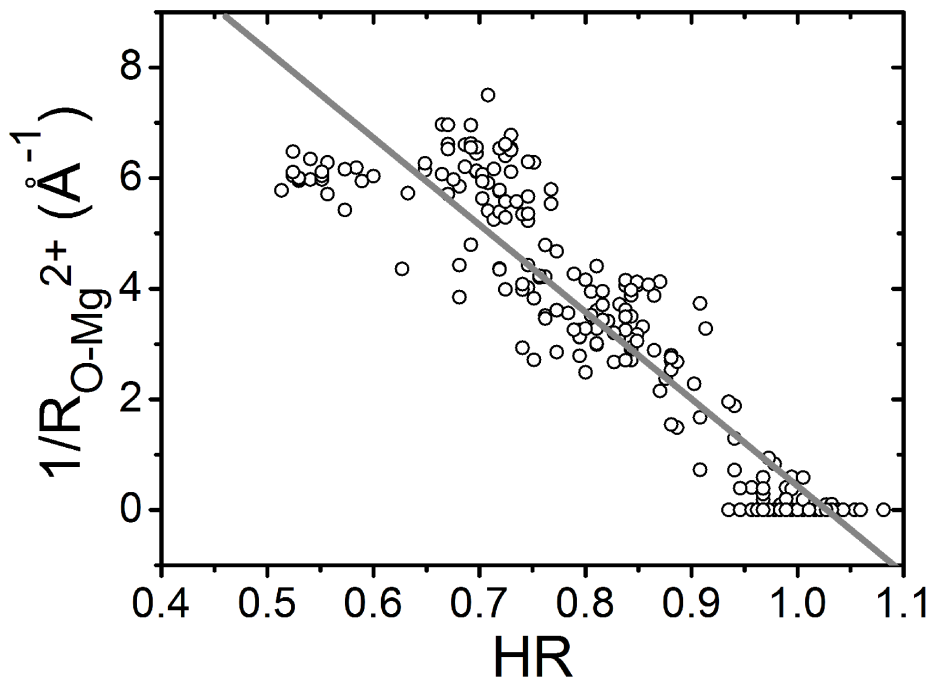

Figure S6: Relationship between  $1/R_{O-Mg^{2+}}$  values and hydration ratio (HR) of mRNA structure. The gray line is fitted by equation:  $1/R_{O-Mg^{2+}} = -15.74D_{hyd} + 16.17$ .

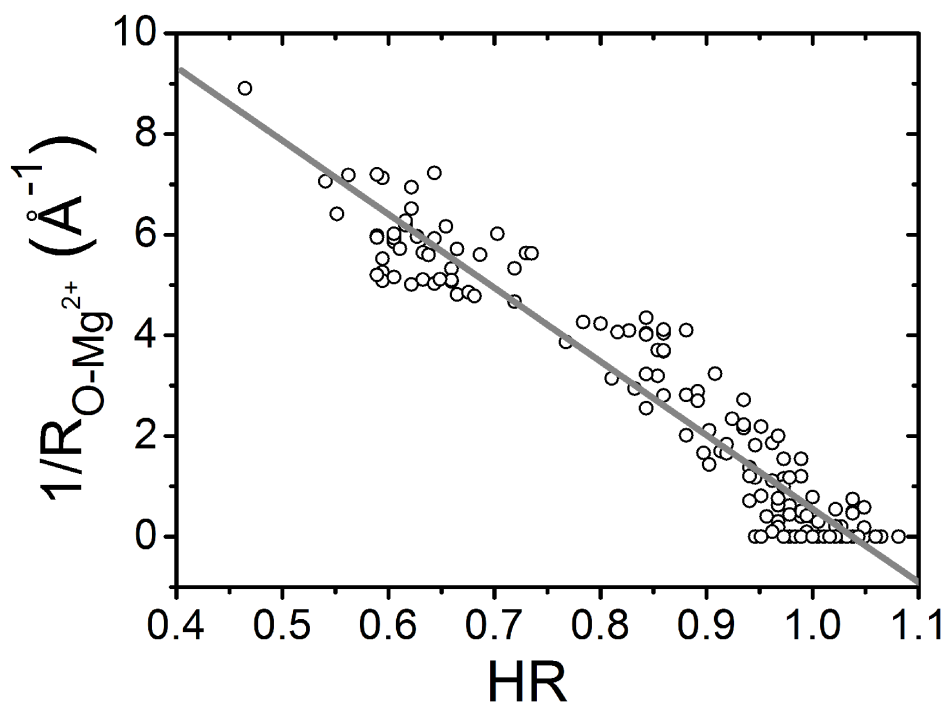

Figure S7: Relationship between  $1/R_{O-Mg^{2+}}$  values and hydration ratio (HR) of BWYV RNA structure. The gray line is fitted by equation:  $1/R_{O-Mg^{2+}} = -14.62D_{hyd} + 15.18$ .
