# Supplementary material
Source: PubMed Central journal article supplement (PMC5883631)
Supplement: mmc2.pdf [file mmc2.pdf]

# Hexahydrated $\text{Mg}^{2+}$ Binding and Outer-Shell Dehydration on RNA Surface

Tao Yu<sup>1,2</sup> and Shi-Jie Chen<sup>2,\*</sup><sup>1</sup>Department of Physics, Jiangnan University, Wuhan, Hubei, China and <sup>2</sup>Departments of Physics and Biochemistry and MU Informatics Institute, University of Missouri, Columbia, Missouri

**ABSTRACT** The interaction between metal ions, especially  $\text{Mg}^{2+}$  ions, and RNA plays a critical role in RNA folding. Upon binding to RNA, a metal ion that is fully hydrated in bulk solvent can become dehydrated. Here we use molecular dynamics simulation to investigate the dehydration of bound hexahydrated  $\text{Mg}^{2+}$  ions. We find that a hydrated  $\text{Mg}^{2+}$  ion in the RNA groove region can involve significant dehydration in the outer hydration shell. The first or innermost hydration shell of the  $\text{Mg}^{2+}$  ion, however, is retained during the simulation because of the strong ion-water electrostatic attraction. As a result, water-mediated hydrogen bonding remains an important form for  $\text{Mg}^{2+}$ -RNA interaction. Analysis for ions at different binding sites shows that the most pronounced water deficiency relative to the fully hydrated state occurs at a radial distance of around 11 Å from the center of the ion. Based on the independent 200 ns molecular dynamics simulations for three different RNA structures (Protein Data Bank: 1TRA, 2TPK, and 437D), we find that  $\text{Mg}^{2+}$  ions overwhelmingly dominate over monovalent ions such as  $\text{Na}^+$  and  $\text{K}^+$  in ion-RNA binding. Furthermore, application of the free energy perturbation method leads to a quantitative relationship between the  $\text{Mg}^{2+}$  dehydration free energy and the local structural environment. We find that  $\Delta\Delta G_{\text{hyd}}$ , the change of the  $\text{Mg}^{2+}$  hydration free energy upon binding to RNA, varies linearly with the inverse distance between the  $\text{Mg}^{2+}$  ion and the nearby non-bridging oxygen atoms of the phosphate groups, and  $\Delta\Delta G_{\text{hyd}}$  can reach  $-2.0$  kcal/mol and  $-3.0$  kcal/mol for an  $\text{Mg}^{2+}$  ion bound to the surface and to the groove interior, respectively. In addition, the computation results in an analytical formula for the hydration ratio as a function of the average inverse  $\text{Mg}^{2+}$ -O distance. The results here might be useful for further quantitative investigations of ion-RNA interactions in RNA folding.

## INTRODUCTION

The folding of RNA involves metal-ion-binding to RNA to neutralize the RNA backbone charge and screen Coulomb repulsion between the backbone charges (1–6). The ion atmosphere of bound ions around the nucleic acid plays a critical role in stabilizing the three-dimensional structure of RNA and carrying out RNA-based enzymatic catalysis (7–14). In particular, the  $\text{Mg}^{2+}$  ion, which shows unusually high efficiency in stabilizing RNA tertiary structures (11,15,16), is essential for the proper folding and stabilization of these structures (8,17–19).

Metal ions around an RNA helix accumulate around the major and minor grooves (distance within 8 Å from the central axis) and the surface region (10–15 Å from the RNA surface). Furthermore, an RNA structure often involves multiple bound  $\text{Mg}^{2+}$  ions in the RNA grooves and/or other sites on the RNA surface (20–22). Such an

ion accumulation effect can lower the overall electrostatic energy of the system and help stabilize the structure (15,17,23).

A number of theoretical approaches, such as the Poisson-Boltzmann theory (24), the counterion condensation model (25–27), the tightly bound ion (TBI) model (28–32), the three-dimensional reference interaction site model (33,34), and all-atom molecular dynamics (MD) simulation methods (23,35–42), have been developed to predict the ion distribution around RNA. Among these methods, MD simulation has the unique advantage of providing detailed atomistic and dynamic descriptions for ion binding (37,38). Recently, MD simulations and anomalous small-angle x-ray scattering experiments showed an interesting radial distance-concentration relationship for  $\text{Mg}^{2+}$  binding around the RNA surface (37,38,43). Moreover, MD simulations can adapt to various force field parameters (38,44–46) and, depending on the force field and the sampling algorithm, can provide more detailed and accurate predictions (35–38,43) for ion distributions around nucleic acids than the nonlinear Poisson-Boltzmann equation calculations.

---

Submitted June 21, 2017, and accepted for publication January 31, 2018.

\*Correspondence: [chenshi@missouri.edu](mailto:chenshi@missouri.edu)

Editor: Tamar Schlick.

<https://doi.org/10.1016/j.bpj.2018.01.040>

© 2018 Biophysical Society.

The TBI model has the advantage of accounting for ion correlation and fluctuation effects. These effects are potentially important for multivalent ions such as  $\text{Mg}^{2+}$  ions (7). However, neither the original coarse-grained TBI model nor the more recent Monte Carlo TBI model (47), the new generation model based on atomistic ion distributions and Monte Carlo sampling of the ion distribution, can treat the dehydration effect. To include ion dehydration effects in the TBI/Monte Carlo TBI and other models, we need quantitative understanding of the dehydration states of the bound ions at the different RNA sites and a dehydration free-energy function for ions bound at the different sites. In this study, we derive such an energy function through MD simulation.

Despite the critical role of  $\text{Mg}^{2+}$ -RNA interaction in RNA folding, predicting  $\text{Mg}^{2+}$  binding sites remains a significant challenge. Studying  $\text{Mg}^{2+}$  distribution around RNA using traditional x-ray diffraction and solution NMR methods can be challenging because of RNA flexibility and the mobility of  $\text{Mg}^{2+}$  ions in the solution. In addition, ion-ion correlation, ion and RNA dehydration, the interplay between the specific and nonspecific ion-RNA interactions, and the different force field parameters for metal ion-RNA interaction further challenge the computational predictions for ion distribution and ion binding sites. Recently, using the grand canonical Monte Carlo sampling combined with MD simulations, Lemkul et al. (35) investigated the  $\text{Mg}^{2+}$  ion distribution around four representative RNA structures and observed inner-sphere and outer-sphere ion binding sites. The study represents a significant advance in studying  $\text{Mg}^{2+}$  distribution around RNA with an explicit solvent. In another recent important study, by combining combined the enhanced sampling techniques with the parameterization for  $\text{Mg}^{2+}$ -related interactions, Cunha and Bussi (36) developed a modified version of bias-exchange metadynamics simulation method. The simulation provided detailed information about the binding affinity of  $\text{Mg}^{2+}$  on the possible binding sites for a four-base-pair RNA duplex (36). The results showed significant improvements in the applicability of the bias-exchange metadynamics method for the calculation of complex free-energy landscapes as well as the affinities for an  $\text{Mg}^{2+}$ -RNA system. Furthermore, the results of the study indicated a reduced divalent ion binding because of RNA conformational flexibility and the competition from other ions.

According to the hydration state,  $\text{Mg}^{2+}$ -RNA interaction can be classified into direct and indirect interactions. For direct interaction, such as  $\text{Mg}^{2+}$  binding to certain sites on rRNA fragments (48) and 23S RNA (49), the  $\text{Mg}^{2+}$  ion interacts with the RNA (phosphate group) as part of the inner-shell coordination sphere of  $\text{Mg}^{2+}$ . For indirect interaction,  $\text{Mg}^{2+}$  retains a hydration shell in the “ion atmosphere” around RNA (37,38), and ion-RNA interaction is mediated by the water molecule in the hydration shell (23,39).  $\text{Mg}^{2+}$  ions are fully hydrated in the bulk solution.

A hydrated  $\text{Mg}^{2+}$  ion has a relatively robust innermost hydration shell with six bound water molecules and a second hydration layer (50,51). As a fully hydrated  $\text{Mg}^{2+}$  ion binds to RNA from bulk solution, the hydration state of the  $\text{Mg}^{2+}$  ion can be changed by the structural and electrostatic environment around the ion binding site (23,39). Specifically, as a hydrated  $\text{Mg}^{2+}$  ion moves closer to specific binding sites on an RNA surface or in the grooves (52,53), the ion may become dehydrated. Such an RNA-induced ion dehydration would result in a change in ion-RNA interactions and significantly influence RNA stability and biological functions.

Efficient and accurate computations for the hydration free energy for a solute molecule or charged ion can be challenging (54–66). Explicit solvent models can give accurate hydration free-energy results but often require exceedingly long computing time (66–68). On the other hand, implicit solvent-based models such as the nonlinear Poisson-Boltzmann model (56,59,69), Born solvent model (70–72), and the weight surface area method (73–77) are computationally efficient, but the accuracy of the results may be inconsistent. Recently, using an adaptive molecular boundary and the corresponding force field, Fennell et al. (78–80) developed a new approach, semiexplicit assembly (SEA), based on the improved field-SEA water models to compute the solvation free energy of nonpolar, polar, and charged solutes. The improved field-SEA algorithm can predict the solvation free energy of charged monovalent ions, and the results are consistent with those predicted from the explicit solvent model (80). For the highly charged  $\text{Mg}^{2+}$  ions, the asymmetry of its dehydration states in the different binding sites on the RNA surface would affect the ion-RNA contact form (18,81,82). Because  $\text{Mg}^{2+}$  ions can bind at different locations around the RNA structure, such as the major and minor grooves, and interact with the phosphate group through strong electrostatic attraction, the hydration free energy of  $\text{Mg}^{2+}$  ions requires a separate, careful evaluation.

In this study, we use MD simulation to investigate the coordinated distribution of water molecules around  $\text{Mg}^{2+}$  at the different binding locations and calculate the hydration free energy  $\Delta G_{\text{hyd}}$  of  $\text{Mg}^{2+}$  using the free energy perturbation (FEP) method in explicit TIP3P solvent. Our simulations show long-time binding of ions and water-mediated  $\text{Mg}^{2+}$ -RNA interactions at different locations. Using the FEP method, we compute the change of the hydration free energy  $\Delta\Delta G_{\text{hyd}}$  as an  $\text{Mg}^{2+}$  ion moves from the bulk solvent to the RNA surface. We find an average change of hydration free energy of around  $-2.0$  kcal/mol for ions bound to the surface and an additional  $-3.0$  kcal/mol free-energy change for those bound to the deep groove. Furthermore, our data indicate that ion dehydration energy varies linearly with the hydration ratio (HR), the ratio of the number of (bound) water molecules between the dehydration and the hydration states. From the simulation results for ions bound at the different locations on RNA, we derive an analytical formula

for the average dehydration energy for ions in the different structural environments of RNA. The analytical formula may provide a useful and efficient estimation for the dehydration of the bound ions.

## MATERIALS AND METHODS

### MD simulation

We select three representative RNA structures to investigate  $\text{Mg}^{2+}$  hydration properties upon RNA binding; see Table 1 for the Protein Data Bank (PDB) identifiers of the structures and the solution conditions in the simulation. In the presimulation treatment, we add hydrogen atom coordinates using the psfgen plugin of Visual Molecular Dynamics (VMD) (Theoretical and Computational Biophysics Group, Urbana-Champaign, IL) (83). The RNA structure is embedded in the respective explicit TIP3P water box. We set the minimal distance between RNA and the box boundary as 25 Å. To simulate the experimental conditions (84–86), salt (NaCl or KCl) and  $\text{Mg}^{2+}$  ions are added to the water boxes. All the metal ion parameters are obtained from a CHARMM36 force field (MacKerell Lab, University of Maryland, Baltimore, MD) (87,88), and their coordinates are randomly placed by using VMD (Theoretical and Computational Biophysics Group). The minimal distance among  $\text{Mg}^{2+}$  ions is 5 Å. To highlight the  $\text{Mg}^{2+}$  binding property, we let the  $\text{Mg}^{2+}$  ions neutralize the RNA charge. The whole system is kept electrically neutral with additional ions and the added  $\text{Cl}^-$  ions. The procedure above is completed with the Solvate and Add Ions plugins of VMD (Theoretical and Computational Biophysics Group), using atomic parameters given by the CHARMM36 force field (MacKerell Lab) (87,88); see Table 1 for the information about the RNA-water-ion solution systems for the three RNA structures.

For each of the above RNA solution systems, using the NAMD 2.10 package (Theoretical and Computational Biophysics Group) (89), we first run minimization for 10,000 steps, with 1 fs time step for the first 1 ns and 2 fs for the subsequent time period. The total simulation time for each RNA solution system is 200 ns. During the simulation, the RNA may translate and drift in the solution. To localize the RNA at the center of the simulation box, we restrict the two backbone C4' and C3' atoms near the box center by applying a harmonic potential with a force constant of 5 kcal/mol · Å<sup>2</sup>. All the other RNA atoms are allowed to move. In the simulation, nonbonded interactions are calculated using the Verlet cutoff scheme, and the cutoff is set to be 12 Å. Long-range electrostatic interactions are treated with the particle mesh Ewald method. All atoms of the system are in the isobaric-isothermal ensemble. The isotropic pressure is maintained at 1 atm, and Langevin dynamics and Langevin piston methods are used. The MD simulation temperature is in accordance with the experimental conditions (298.15 K for tRNA and BWYV, 310 K for mRNA). All the MD simulations are performed on a GPU NVIDIA Tesla C2075 (NVIDIA, Santa Clara, CA).

### FEP calculation for $\text{Mg}^{2+}$ hydration free energy

Based on the equilibrated system after the 200 ns simulation, we determine the hydration free energy of an  $\text{Mg}^{2+}$  ion using the FEP method integrated

in the NAMD 2.10 package (Theoretical and Computational Biophysics Group) (65,90–92). In the FEP calculation, we charge a bare Lennard-Jones particle into an  $\text{Mg}^{2+}$  ion using the dual-topology paradigm. The dual-topology approach has the benefit of improving the convergence while perturbing only the electrostatic component of the nonbonded potential without changing the Lennard-Jones terms (52,93). The  $\text{Mg}^{2+}$  ion hydration energy change is treated as a transformation from the noncharged state (reference state, ion-RNA coupling transformation parameter  $\lambda = 0$ ) to the fully charged state on the RNA surface (target state,  $\lambda = 1$ ). The free-energy difference between the target state and the reference state is the hydration energy  $\Delta G_{\text{hyd}}$  of the ion.

When evaluating the free-energy difference between two states, variable  $\lambda$ -values correspond to the different Hamiltonian in the thermodynamic integration. The variation of  $\lambda$  between 0 and 1 allows interconversion between two states during MD simulation (93). During the ion-charging process that connects the reference state to the target state, a stratification strategy is used. If there are  $N$  states (including  $N - 2$  intermediate states) in the stratification process, the Hamiltonian of coupling parameter  $\lambda$  is

$$H(\lambda_i) = \lambda_i H_1 + (1 - \lambda_i) H_0 = H_0 + \lambda_i \Delta H, \quad (1)$$

where  $\Delta H$  is the perturbation term in the target Hamiltonian and  $H_1 - H_0$  is the net change of the Hamiltonian in the process. The  $i$ -th  $\Delta H$  is obtained from

$$\Delta H_i = H(\lambda_{i+1}) - H(\lambda_i) = (\lambda_{i+1} - \lambda_i) \Delta H = \Delta \lambda_i \Delta H, \quad (2)$$

and the total free-energy difference is

$$\Delta A = -\frac{1}{\beta} \sum_{i=1}^{N-1} \ln \langle e^{-\beta \Delta \lambda_i \Delta H} \rangle_{\lambda_i}, \quad (3)$$

where  $\beta$  is  $1/k_B T$ ,  $k_B$  is the Boltzmann constant, and  $T$  is the temperature. For a given ionic solution system, integrating out the kinetic energy term in the Hamiltonian leads to the following change in the hydration free energy ( $\lambda = 0 \rightarrow 1$ ) for an  $\text{Mg}^{2+}$  ion:

$$\Delta G_{\text{hyd}} = -\frac{1}{\beta} \sum_{i=1}^{N-1} \ln \langle e^{-\beta \Delta \lambda_i \Delta U} \rangle_{\lambda_i}, \quad (4)$$

where  $\Delta U$  denotes the potential energy change from state  $i$  to state  $i + 1$ .

To enhance the sampling quality for the hydration free-energy calculation, we run both ion-charging ( $\lambda = 0 \rightarrow 1$ ) and discharging ( $\lambda = 1 \rightarrow 0$ ) processes for the FEP calculation. Each charging/discharging process is divided into 16 equally spaced simulation windows ( $\Delta \lambda = \pm 0.0625$ ,  $N = 17$  in Eq. 1). For each interval  $\Delta \lambda$ , we run 20,000 MD steps with 2 fs for each step, including the first 5000 equilibration steps. Thus, the total simulated time for calculating the hydration free energy of an  $\text{Mg}^{2+}$  ion is 20,000 (steps) × 2 (fs/step) × [16 (charging) + 16 (discharging)] = 1.28 ns. A soft-core potential for the ions is used to remove the singularity in the van der Waals potential caused by  $\text{Mg}^{2+}$ -solvent contact (94,95). In the final analysis of the FEP calculation, we use

**TABLE 1 Three Representative RNA Models and the Corresponding Simulation Conditions**

| PDB ID | Description | Nucleotide No. | Experiment Method | Resolution (Å) | $\text{Mg}^{2+}$ No. | System Size (Å <sup>3</sup> ) | [ $\text{Mg}^{2+}$ ] (mM) | [ $\text{Na}^+/\text{K}^+$ ] (mM) |
|--------|-------------|----------------|-------------------|----------------|----------------------|-------------------------------|---------------------------|-----------------------------------|
| 1TRA   | tRNA        | 76             | x ray             | 3.0            | 38                   | 100 × 89 × 121                | 20                        | 100 Na <sup>+</sup>               |
| 2TPK   | mRNA        | 36             | NMR               | N/A            | 18                   | 75 × 78 × 102                 | 20                        | 150 K <sup>+</sup>                |
| 437D   | BWYV        | 27             | x ray             | 1.6            | 12                   | 93 × 81 × 80                  | 15                        | 100 Na <sup>+</sup>               |

The RNA coordinates are downloaded from the PDB, and the solution simulation systems are constructed by VMD (Theoretical and Computational Biophysics Group) (83). ID, identifier.

Bennett's acceptance ratio method (the ParseFEP plugin in VMD (Theoretical and Computational Biophysics Group)) to estimate the  $Mg^{2+}$  ion hydration free-energy differences both in the charging and the discharging processes of the alchemical transformation (96). For each  $Mg^{2+}$  binding site, we run 10 independent FEP calculations and calculate the average as well as the standard deviations (SD) over these 10 FEP results. The FEP calculations are performed on Intel Xeon CPU E5-2650 v3 computer clusters (Intel, Santa Clara, CA).

## RESULTS AND DISCUSSION

### Distribution of bound ions

The simulations for the three RNA-water-ion systems show significant  $Mg^{2+}$  ion binding in the major grooves as well as the other regions on the RNA surface.  $Mg^{2+}$  ions, which carry higher charges than monovalent ions, are more competitive in RNA binding than  $Na^+$  or  $K^+$  ions (see Fig. 1). Physically, charge neutralization requires fewer divalent ions than monovalent ions. Less ion binding means less ion entropic decrease upon RNA binding. Therefore, divalent ions are preferred over monovalent ions in RNA binding (31,32,48). To investigate the distribution of the "bound" ions, we focus on the metal ions within 5 Å from the RNA surface. For the tRNA system, there are on average 20 bound  $Mg^{2+}$  ions in the region. In contrast, there are only  $\sim 15 Na^+$  ions and 1  $Cl^-$  in the same "bound" region. The result shows that  $Mg^{2+}$  has a much stronger tendency to accumulate around the RNA structure than  $Na^+$  (15,17,19,23,39).

As shown in Fig. 1 a, the simulation can predict stable ion binding sites (pink for  $Mg^{2+}$  ions) with long residence time, including sites in close agreement with those observed in the crystallographic structure (e.g., Fig. 1 a, the five sites marked in blue) as well as additional potential sites not shown in the crystallographic structure. The coordinate fluctuations of the bound ions during the 200 ns MD simulation (see Fig. S1) indicate that about half of all the bound ions reside inside or around the entrance of the major grooves. During the simulation, the RNA structures do not experience large conformational changes except for the fluctuations in base orientations.

The bound-ion distribution and the specific ion binding sites can be sensitive to the structural constraint and the backbone charge distribution of RNA. Because the phosphate group of the RNA structure carries a negative charge,  $Mg^{2+}$  ions tend to bind to RNA around the phosphate groups, and such an ion-RNA binding can be further stabilized by a water-mediated hydrogen bond network (see Fig. 2). Another important factor that can influence ion binding is the geometric shape of the RNA surface, particularly in the major and minor grooves. The different widths and depths of the grooves determine the different accessibility for ion binding. For example, a hydrated  $Mg^{2+}$  ion can only bind to the surface (instead of the interior) of the minor groove because the groove is not deep enough.

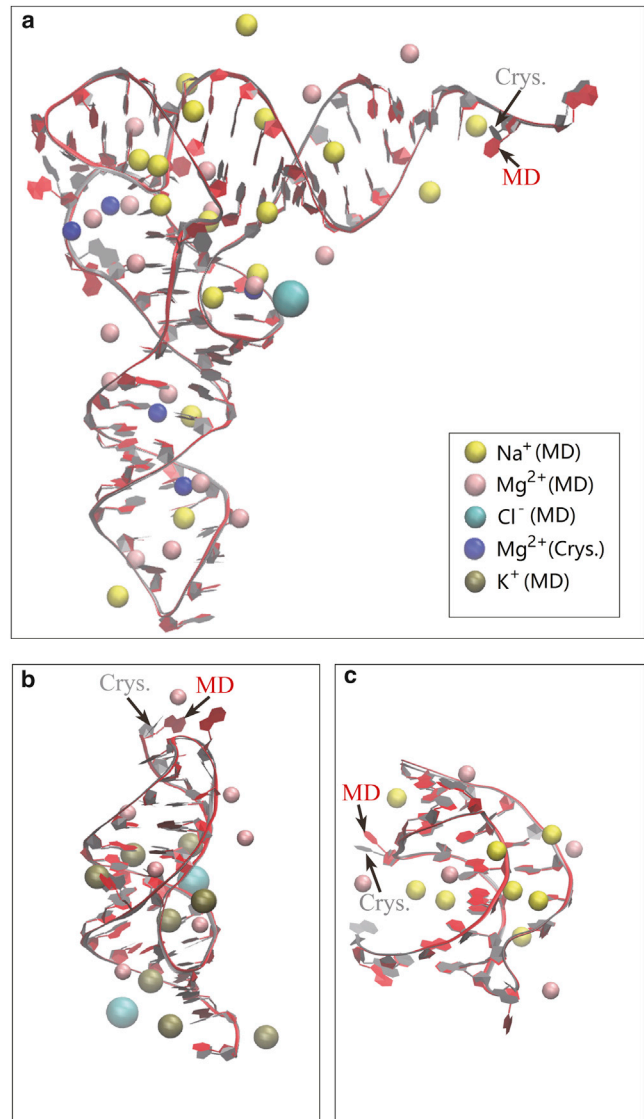

FIGURE 1 Comparison between the PDB crystal structure and MD snapshot structures of the three RNA models: (a) the yeast phenylalanine tRNA (PDB: 1TRA); (b) a gene 32 messenger RNA pseudoknot of bacteriophage T2 (PDB: 2TPK); and (c) BWYV, a ribosomal frameshifting viral pseudoknot (PDB: 437D). The RNA contour structures are drawn using NewRibbons of VMD (Theoretical and Computational Biophysics Group) (83). The crystal structure (Crys.) and the MD simulated structure (MD) are very close except for the orientations of a few bases. The figure shows the simulated distributions of the different metal ions:  $Na^+$ ,  $K^+$ ,  $Mg^{2+}$  (MD), and  $Cl^-$ . Also shown in (a) are the five  $Mg^{2+}$  ions (Crys.) observed in the crystal structures. To see this figure in color, go online.

Specifically, since the major groove in an A-form RNA helix is deep and narrow and the minor groove is wide and shallow, a fully hydrated  $Mg^{2+}$  ion cannot enter the major groove, which is too narrow for it. This steric effect competes against the electrostatic effect, since the high local charge density around the major groove can cause a strong attraction for the  $Mg^{2+}$  ion. The interplay between the geometric accessibility and the ion-RNA electrostatic force

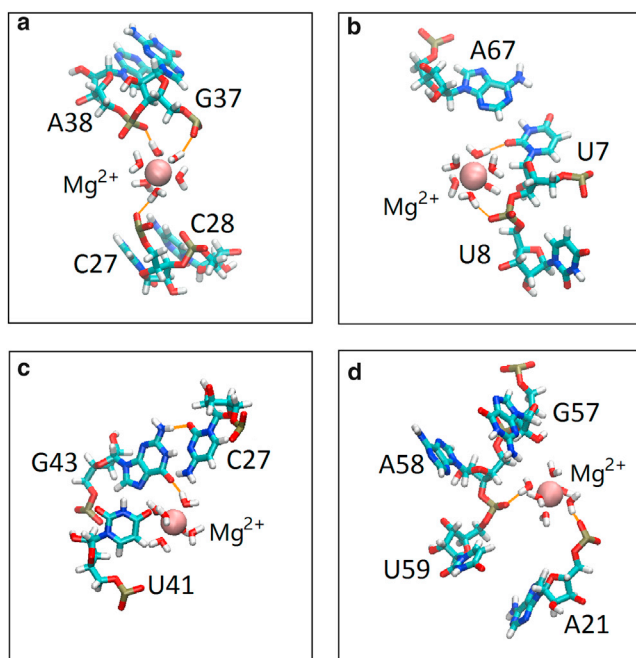

FIGURE 2 (a–d) Four hexahydrated  $\text{Mg}^{2+}$  ions inside the major grooves of a tRNA structure (PDB: 1TRA). Each ion is stabilized by a hydrogen bond network between the hexahydrated  $\text{Mg}^{2+}$  ions and the RNA. The nucleotides of RNA are represented by the backbone model. The spheres represent  $\text{Mg}^{2+}$  ions. To see this figure in color, go online.

plays an important role in determining the dehydration states for ions binding to the RNA structure at different sites.

### Dehydration of $\text{Mg}^{2+}$ ions upon binding to RNA

In the bulk solvent away from the RNA surface,  $\text{Mg}^{2+}$  ions are fully hydrated with six tightly bound water molecules in the first hydration shell and more water molecules in the second hydration layer. Due to the strong attraction between the  $\text{Mg}^{2+}$  ion and the hexahydrated water molecules in the first hydration shell, full dehydration of the first hydration shell is rare for  $\text{Mg}^{2+}$  ions (18). As a result, water-mediated contact becomes the major form for the interaction between RNA and bound  $\text{Mg}^{2+}$  ions. The most important water-mediated interaction is hydrogen bonding between the first water shell and the phosphate group or the bases in the RNA. Sampling of the ion distributions in our MD simulation showed that dehydration mostly occurs for  $\text{Mg}^{2+}$  ions located inside the major (deep and narrow) grooves. This is because the narrow, deep groove causes a high charge density to attract the  $\text{Mg}^{2+}$  ions, and the water molecules around the  $\text{Mg}^{2+}$  ion must be removed for the ion to enter the narrow groove.

To further characterize water-mediated interactions, we select four representative bound  $\text{Mg}^{2+}$  ions corresponding to the  $\text{Mg}^{2+}$  ions observed in the experimentally determined crystal structure. For example, in the tRNA structure, our simulation shows four hexahydrated  $\text{Mg}^{2+}$  ions inside the

major grooves, where each ion is stabilized by a hydrogen bond network between the hexahydrated  $\text{Mg}^{2+}$  ions and the RNA (see Fig. 2). The variation of the hydrogen bond number from one to three may indicate the different stabilities for the  $\text{Mg}^{2+}$ -RNA interactions.  $\text{Mg}^{2+}$ -RNA binding not only neutralizes the negative charges on RNA but also stabilizes the specific RNA tertiary interactions through the water-mediated hydrogen bond network. Once the hydrogen bonds are formed, the water-mediated ion-RNA interactions will stabilize the  $\text{Mg}^{2+}$  ion with a long residence time (see Fig. S1 for the data). To further characterize the bound-ion distribution, we calculate the distance between the  $\text{Mg}^{2+}$  ion and the nearest oxygen atom on RNA. In most cases, the distance varies between 3.9 and 4.5 Å. The short distance indicates a strong binding of the  $\text{Mg}^{2+}$  ion in the major groove.

To illustrate the water distribution around the  $\text{Mg}^{2+}$  ions, we calculate the number and the distribution of water molecules around bound  $\text{Mg}^{2+}$  ions at the different binding sites. Fig. 3 a shows that because of the strong electrostatic attraction between  $\text{Mg}^{2+}$  and water, the first water shell ( $\sim 2$  Å from  $\text{Mg}^{2+}$  to the oxygen (O) atom of water molecule) is very stable. In contrast, the second water layer (from four to five Å from the  $\text{Mg}^{2+}$  ion) undergoes a variety of different levels of dehydration when  $\text{Mg}^{2+}$  approaches the RNA structure. This finding is consistent with the water density distribution in Fig. 3 b, which shows that the first hydration shell is robust, and the dehydration starts from the second hydration shell.

According to the distance between the  $\text{Mg}^{2+}$  ion and the different atoms on the RNA structure, we can classify three types of  $\text{Mg}^{2+}$  binding sites: inside the major grooves (“groove sites”), on the surface of RNA (“surface sites”), and in the bulk solvent. As shown in Fig. 3,  $\text{Mg}^{2+}$  ions bound at the different types of locations show distinct levels of dehydration. Specifically, we find that  $\text{Mg}^{2+}$  ions bound inside the major grooves and folded loop structures on the RNA surface show stronger dehydration.

We quantify the level of dehydration using the HR parameter. HR at distance  $r$  from the center of the ion is defined as  $\text{HR}(r) = N(r)/N_0(r)$ , where  $N(r)$  is the number of water molecules inside the sphere of radius  $r$  around a dehydrated ion and  $N_0(r)$  is the number of water molecules in the same sphere for a fully hydrated ion. HR is between 0.0 and 1.0 with one for the fully hydrated state and zero for the fully dehydrated states in the reference state. Therefore, HR measures the degree of dehydration for an ion. Large and small HR values correspond to weak and strong dehydration, respectively. As an  $\text{Mg}^{2+}$  ion binds to RNA, the dehydration states of the  $\text{Mg}^{2+}$  ion and the corresponding phosphate group are coupled and often occur concomitantly. Water molecules around an originally fully hydrated  $\text{Mg}^{2+}$  ion will be rejected into the solution because of geometry restriction and the strong  $\text{Mg}^{2+}$ -RNA electrostatic attraction, resulting in a reduced HR.

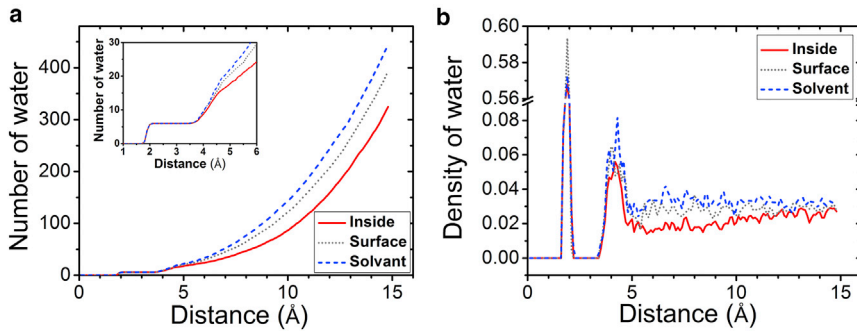

FIGURE 3 Water distributions around the highly positively charged  $Mg^{2+}$  ions. The total number of water molecules (a) and the density distribution around the  $Mg^{2+}$  ions (b) are plotted in different situations. The dashed line represents the  $Mg^{2+}$  ions in the bulk solvent. The dotted and solid lines represent  $Mg^{2+}$  ions located on the external surface and inside the major groove, respectively. To see this figure in color, go online.

Fig. 4 shows the  $HR(r)$  for a bound  $Mg^{2+}$  ion as a function of the radial distance  $r$ . The HR shows a nonmonotonic behavior with a minimum at  $r \approx 11$  Å. The nonmonotonic behavior of  $HR(r)$  can be understood as follows. As shown in Fig. 3 b, the dehydration occurs predominantly in the region between  $r \approx 4$  Å ( $\sim$ second hydration shell) and  $r \approx 11$  Å. Therefore,  $HR(r)$  decreases in the above range. However, for distant regions further away from the ion ( $r > 11$  Å), the dehydration effect is weak (see Fig. 3 b), and thus the overall relative water deficiency within a large radius  $r > 11$  Å is less pronounced, resulting in an increase in  $HR(r)$ . This result is mainly caused by the steric restriction of the RNA surface.

### Ion dehydration free energy associated with ion-RNA binding

To understand and predict ion binding, it is important to accurately calculate the free-energy change for dehydration. We employ the FEP method to compute the hydration free energy  $\Delta G_{\text{hyd}}$  for  $Mg^{2+}$  ions bound at different locations. For small simulation boxes (52), the results for  $\Delta G_{\text{hyd}}$  can be dependent on the size of the box. To examine the size-dependence of the hydration free energy, we perform the simulations based on a series of different box sizes ranging from  $L = 30$  to  $210$  Å, with an  $Mg^{2+}$  ion placed at the center of the  $L \times L \times L$  box. The results in Fig. 5 show the rapid

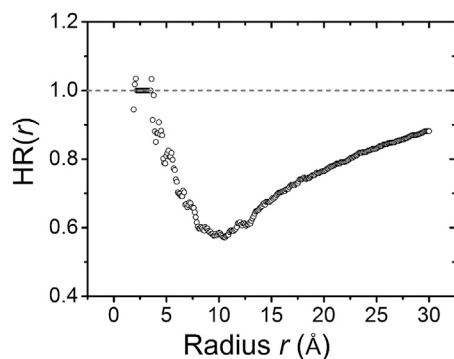

FIGURE 4  $HR(r)$  (circles) as a function of the radial distance  $r$  from the  $Mg^{2+}$  ion. The dotted reference line represents the fully hydrated  $Mg^{2+}$  ion in the bulk solution.

increase in the number of atoms in the system and the MD simulation time with the box size. Taking box size with  $210$  Å as an example, the system contains  $906,301$  atoms, and simulating every  $1$  ns can cost  $3$  days in a GPU cluster NVIDIA Tesla C2075 (NVIDIA). The hydration free energy decreases with the box size and reaches a stable value if the box is large enough (such as  $210$  Å in Fig. 5). In the tRNA simulation system, the total atom number is  $97,424$ , and the system size corresponds to a  $100 \times 100 \times 100 \text{Å}^3$  cubic box. The simulation gives the hydration free energy for a free  $Mg^{2+}$  ion in the simulation system as about  $-412.0$  kcal/mol. In the mRNA or BWYV RNA systems, however, the simulation system corresponds to a  $85 \times 85 \times 85 \text{Å}^3$  cubic box, and  $\Delta G_{\text{hyd}}$  is about  $-407.0$  kcal/mol. Thus the  $\Delta G_{\text{hyd}}$  results for an unbound  $Mg^{2+}$  ion in the different RNA systems are similar to those with the same box size shown in Fig. 5.

Ions binding to the different sites on RNA can have different dehydration states for the ions. Therefore, the hydration free energy  $\Delta G_{\text{hyd}}$  for a bound  $Mg^{2+}$  ion is dependent on the RNA structural environment around the binding site. Fig. 6 shows the dehydration free-energy change of  $Mg^{2+}$  ions in the tRNA-water-ion system. Because O atoms carry the most negative charges of the RNA structure (87), the strong interaction between  $Mg^{2+}$  and RNA can cause the  $Mg^{2+}$  ion and the O atoms to form a short-range ordered

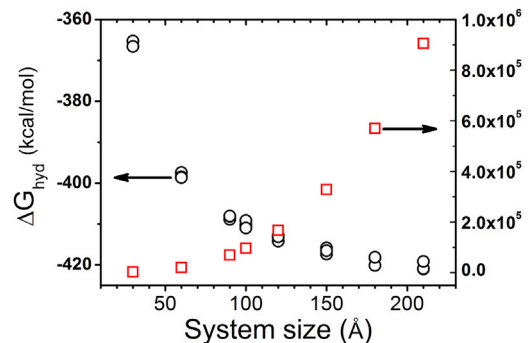

FIGURE 5 The dependence of the hydration free energy of  $Mg^{2+}$  ion on the size of the simulation system. The circles and squares represent the hydration free energy and the number of atoms for the different system sizes, respectively. To see this figure in color, go online.

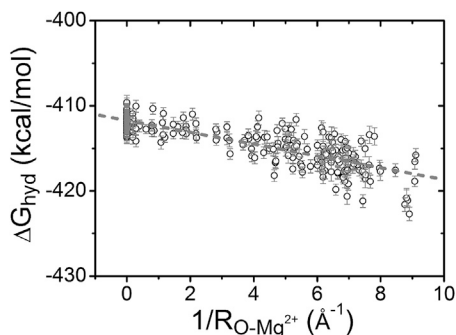

FIGURE 6 The hydration free energy for  $\text{Mg}^{2+}$  ions bound at different binding sites. The dotted line shows the fitted formula (SD 1.39 kcal/mol):  $\Delta G_{\text{hyd}} = -0.67/R_{\text{O-Mg}^{2+}} - 411.78$ .

configuration. The  $\text{Mg}^{2+}$ -O distance can significantly influence the ion-RNA binding strength. As shown in Fig. 4, the minimal HR, namely, overall maximal dehydration, occurs at an  $\text{Mg}^{2+}$ -O distance of around 11 Å. Therefore, to parameterize the hydration free-energy change, we consider the sum of the inverse  $\text{Mg}^{2+}$ -O distance within 11 Å. As shown in Fig. 6,  $\Delta G_{\text{hyd}}$  for a bound  $\text{Mg}^{2+}$  ion decreases with the sum of inverse  $\text{Mg}^{2+}$ -O distance,  $1/R_{\text{O-Mg}^{2+}}$ . Analysis of the FEP-predicted  $\Delta G_{\text{hyd}}$  for  $\text{Mg}^{2+}$  ions bound at the different sites on RNA gives the following quantitative relationship:

$$\Delta G_{\text{hyd}} = -\frac{0.67}{R_{\text{O-Mg}^{2+}}} - 411.78,$$

where  $R_{\text{O-Mg}^{2+}}$  and  $\Delta G_{\text{hyd}}$  are in the units of Å and kcal/mol, respectively. The SD is  $\sim 1.39$  kcal/mol.

The above formula quantifies the  $\text{Mg}^{2+}$  hydration free energy as a function of bound ion sites. It is important to note that the above free-energy function effectively accounts for not only the dehydration of the ion but also that of the RNA. The formula gives a low hydration free energy for  $\text{Mg}^{2+}$  ions located in the grooves of the RNA structure, in which case  $1/R_{\text{O-Mg}^{2+}}$  can be larger than  $5.0 \text{ \AA}^{-1}$ . Another important result from the above formula is the linear dependence of  $\Delta G_{\text{hyd}}$  on  $1/R_{\text{O-Mg}^{2+}}$ . The large value of  $1/R_{\text{O-Mg}^{2+}}$  corresponds to closer  $\text{Mg}^{2+}$  proximity to RNA and hence greater magnitude of the hydration free energy. Furthermore, the results from Fig. 6 and the above analytical formula indicate that 1)  $\Delta G_{\text{hyd}}$  is lowered by 0.67 kcal/mol as  $1/R_{\text{O-Mg}^{2+}}$  is increased by  $1.0 \text{ \AA}^{-1}$ , and 2)  $\Delta G_{\text{hyd}}$  is approximately equal to  $-411.78$  kcal/mol for a fully hydrated  $\text{Mg}^{2+}$  ion in the bulk solution of the tRNA-water-ion system. This conclusion is consistent with the results in Fig. 5 with a box size of  $100 \text{ \AA}$ .

### $\text{Mg}^{2+}$ hydration at different binding sites

According to the binding positions and the corresponding hydration free energies, we find  $\text{Mg}^{2+}$  binding scenarios

can be classified into the aforementioned three types:  $\text{Mg}^{2+}$  binding inside the grooves (“groove sites”), on the RNA surface (“surface sites”), and  $\text{Mg}^{2+}$  in the bulk solvent. We find that  $\text{Mg}^{2+}$  binding inside the major groove is accompanied by a large HR and small coordinate fluctuation of the bound ion. Table 2 shows the results for  $\text{Mg}^{2+}$  ion hydration free energies and the dependence on the different binding positions from bulk solution to deep major grooves. The results indicate that the maximal  $\Delta G_{\text{hyd}}$  for  $\text{Mg}^{2+}$  ion is about  $-5.0$  kcal/mol, corresponding to the change in the hydration free energy for transferring an  $\text{Mg}^{2+}$  ion from the bulk solution to the deep inside of the major groove. Our detailed analysis of the simulation results suggests that the total free-energy change ( $-5.0$  kcal/mol) can be decomposed into two parts:  $-2.0$  kcal/mol for the binding to the RNA external surface, and  $-3.0$  kcal/mol for moving from the RNA external surface to the inside of the groove.

In addition to the relationship between  $1/R_{\text{O-Mg}^{2+}}$  and the hydration free energy  $\Delta G_{\text{hyd}}$ , there also exists a correlation between  $1/R_{\text{O-Mg}^{2+}}$  and the dehydration ratio. Since  $\text{HR}(r)$  as a function of the distance  $r$  to the  $\text{Mg}^{2+}$  ion shows a minimal HR around  $r \approx 11 \text{ \AA}$  (see Fig. 4), we investigate the relationship between the HR and  $1/R_{\text{O-Mg}^{2+}}$  for  $r \leq 11 \text{ \AA}$ . Fig. 7 shows a roughly linear relationship between HR and  $1/R_{\text{O-Mg}^{2+}}$  with a slope equal to  $-15.44 \text{ \AA}^{-1}$ . A low HR such as 0.45 corresponds to a situation in which a large number (more than 50%) of the water molecules are rejected from the  $\text{Mg}^{2+}$  hydration shell by RNA atoms. Usually stronger water-mediated interactions between the  $\text{Mg}^{2+}$  ion and RNA atoms cause a larger  $1/R_{\text{O-Mg}^{2+}}$  and a lower HR (stronger dehydration).

### Ion dehydration upon RNA binding: monovalent vs divalent ions

Due to the different charges carried by monovalent and divalent ions,  $\text{Na}^+$  and  $\text{Mg}^{2+}$  surrounding an RNA structure can have very different dehydration state and binding modes. We calculate the hydration free-energy change of  $\text{Na}^+$  ion at different binding sites using FEP. As shown in Fig. 8, compared with  $\text{Mg}^{2+}$  (Fig. 6),  $\text{Na}^+$  has two main different features in  $\Delta G_{\text{hyd}}$ . First,  $\text{Na}^+$  ion binding involves a much smaller  $\Delta G_{\text{hyd}}$  than  $\text{Mg}^{2+}$ , with a ratio of 1:4.63. We find that the hydration free energy changes nonlinearly with the charge of the metal ion. Second, unlike  $\text{Mg}^{2+}$ , the  $\Delta G_{\text{hyd}}$

TABLE 2 The Change of an  $\text{Mg}^{2+}$  Ion Hydration Free Energy  $\Delta G_{\text{hyd}}$  as the Ion Moves from the Bulk Solution to the Major Groove of an RNA Helix

| Categories                                 | Bulk Solution | Peripheral Surface | Deep Inside  |
|--------------------------------------------|---------------|--------------------|--------------|
| $1/R_{\text{O-Mg}^{2+}} (\text{\AA}^{-1})$ | 0.0           | 3.0                | 8.0          |
| $\Delta G_{\text{hyd}}$ (kcal/mol)         | -412.0 (0.6)  | -414.0 (0.7)       | -417.0 (0.7) |
| $\Delta\Delta G_{\text{hyd}}$ (kcal/mol)   | 0.0           | -2.0               | -5.0         |

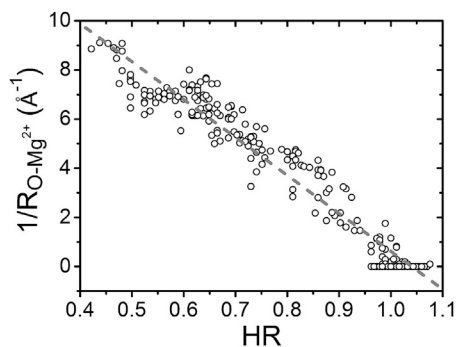

FIGURE 7 Relationship between HR and the  $\text{Mg}^{2+}$ -RNA distance. The dotted line is fitted by the following equation (SD 0.69):  $1/R_{\text{O-Mg}^{2+}} = -15.44 \text{ HR} + 16.06$ .

of  $\text{Na}^+$  does not change linearly with  $1/R_{\text{O-Na}^+}$  (see Fig. 8). For  $\text{Na}^+$  ions bound to the deep inside of the grooves (sum of the  $1/R_{\text{O-Na}^+} > 7.0$ ), the hydration free energy decreases rapidly. Detailed analysis for the hydration state of the  $\text{Na}^+$  ion in the RNA grooves indicates that, unlike the  $\text{Mg}^{2+}$  ion with its robust first hydration shell, the first hydration shell of the bound  $\text{Na}^+$  can be disrupted. The different hydration states between  $\text{Na}^+$  and  $\text{Mg}^{2+}$  arise from the fact that the lower charge of  $\text{Na}^+$  leads to a weaker ion-water attraction, causing a less stable hydration shell. The disruption of the first hydration shell leads to direct contact between the ion and RNA, resulting in a steep decrease in the free energy. In contrast, because of the much stronger  $\text{Mg}^{2+}$ -water attraction, despite the ion binding site, the first shell of water molecules around the  $\text{Mg}^{2+}$  ion remains nearly intact.

## CONCLUSIONS

When an  $\text{Mg}^{2+}$  ion diffuses from the bulk solution to the RNA surface and binds to RNA, especially inside the grooves, the fully hydrated ion may become dehydrated so that water molecules originally bound to the ion are removed from the hydration shell and released into the bulk solution. Through MD simulation with explicit solvent, we investigated the distribution of bound  $\text{Mg}^{2+}$  ions and the

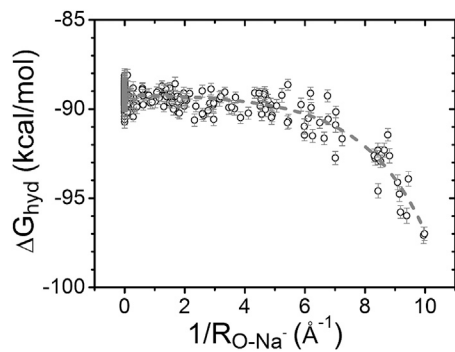

FIGURE 8 Hydration free energy of  $\text{Na}^+$  at different binding sites. The curve shows the trend of the hydration free-energy change.

change in the ion hydration state at the different binding sites. This study leads to several conclusions:

- 1) Our MD simulation shows that ions at the experimentally observed binding sites exhibit low fluctuation and long dwell time. Moreover, combined with the coordinate fluctuation analysis, the simulation also predicts additional potential  $\text{Mg}^{2+}$  binding sites in the major groove not shown in the crystal structure. More extensive theoretical and experimental structural studies may provide further information to examine the accuracy of the predicted binding sites.
- 2) The dehydration state of the first water shell was not observed in the limited multiple trajectory 200 ns MD simulations, suggesting a high energy barrier for inner sphere dehydration. Meanwhile, we find that water-mediated hydrogen bonding remains an important form of  $\text{Mg}^{2+}$ -RNA interaction.
- 3) Using the HR—defined as the ratio of the number of (bound) water molecules between the dehydration and the fully hydrated states—as a measure for ion dehydration, we find the overall minimal hydration (maximal dehydration relative to the fully hydrated state) occurs at a radial distance of 11.0 Å around the  $\text{Mg}^{2+}$  ion. This result suggests that the strong  $\text{Mg}^{2+}$ -water attraction holds the first hydration shell nearly intact during the simulation. Therefore, for the observed binding sites,  $\text{Mg}^{2+}$ -RNA interactions involve water-mediated hydrogen bonding.
- 4) Ions bound to RNA at the different sites show different dehydration ratios; in particular,  $\text{Mg}^{2+}$  ions binding deeply into the major groove have the lowest HR (i.e., highest dehydration ratio).
- 5) An important result of this study is the analytical formula for the relationship between  $\text{Mg}^{2+}$  ion dehydration energy and RNA structure around the binding site. The FEP calculation gives the hydration free-energy change  $\Delta\Delta G_{\text{hyd}}$  as a linear function of the inverse distance between the  $\text{Mg}^{2+}$  ion and the surrounding O atoms,  $1/R_{\text{O-Mg}^{2+}}$ .  $\Delta\Delta G_{\text{hyd}}$  decreases by  $-0.67$  kcal/mol as  $1/R_{\text{O-Mg}^{2+}}$  increases by  $1 \text{ Å}^{-1}$ . Our analysis indicates that  $\Delta\Delta G_{\text{hyd}}$  can reach  $-2.0$  kcal/mol for  $\text{Mg}^{2+}$  ions bound to the RNA exterior surface and  $-3.0$  kcal/mol for those bound to the groove.
- 6) We find a similar linear dependence of the HR as a function of  $1/R_{\text{O-Mg}^{2+}}$ . Putting together the results here suggests that the dehydration of a  $\text{Mg}^{2+}$  ion bound to RNA may be predominantly determined by the geometric constraints of the RNA surface and the electrostatic attraction between  $\text{Mg}^{2+}$  and RNA.

The current study has several limitations. First, the metal ion force field is crucial for the simulation. In future model development, it is important to test the results by using different force fields. Second, it may be necessary to test the sampling effect by either running multiple trajectories



and/or a longer time simulation (35,36). Third, in the future, it would be useful to run systematic tests for a series of RNA structures on the ion binding sites and compare them with experiments.

An in vivo environment is much more complicated than the solution conditions studied here. However, the ion effects investigated based on simple systems may be useful for understanding in vivo RNA functions. For example, a recent study on the effects of  $Mg^{2+}$  in RNA folding showed that the high concentration of  $Mg^{2+}$  in liver may play a critical role in promoting the formation of an RNA kissing complex, a structure essential for efficient hepatitis C viral replication. This result suggests that  $Mg^{2+}$ -dependent structural equilibrium may be an adaptive property of the hepatitis C genomic RNA (97–99). Furthermore, the results from the current study, including the analytical formulas for the dehydration free energy, may serve as a useful starting point for a systematic development of the dehydration free energy as a function of the structure environment of the binding site. Such an energy function can provide a useful tool for quantitative estimation of the ion dehydration probabilities and the metal ion effects on RNA folding stability.

## SUPPORTING MATERIAL

Seven figures are available at [http://www.biophysj.org/biophysj/supplemental/S0006-3495\(18\)30203-0](http://www.biophysj.org/biophysj/supplemental/S0006-3495(18)30203-0).

## AUTHOR CONTRIBUTIONS

S.-J.C. designed the research. T.Y. performed the simulations. T.Y. and S.-J.C. performed the analysis. Both authors contributed to writing the article.

## ACKNOWLEDGMENTS

This work was supported by National Institutes of Health grants R01-GM117059 and R01-GM063732 to S.-J. C and the China Scholarship Council Foundation grant 201408420100 and the National Natural Science Foundation of China grant 11304123 to T.Y. The FEP computations were performed on the high-performance computing resources at the University of Missouri Bioinformatics Consortium.

## REFERENCES

- Bloomfield, V. A. 1997. DNA condensation by multivalent cations. *Biopolymers*. 44:269–282.
- Qiu, X., V. A. Parsegian, and D. C. Rau. 2010. Divalent counterion-induced condensation of triple-strand DNA. *Proc. Natl. Acad. Sci. USA*. 107:21482–21486.
- Qiu, X., K. Andresen, ..., L. Pollack. 2008. Abrupt transition from a free, repulsive to a condensed, attractive DNA phase, induced by multivalent polyamine cations. *Phys. Rev. Lett.* 101:228101.
- Knobler, C. M., and W. M. Gelbart. 2009. Physical chemistry of DNA viruses. *Annu. Rev. Phys. Chem.* 60:367–383.
- O'Rear, J. L., S. Wang, ..., D. Herschlag. 2001. Comparison of the hammerhead cleavage reactions stimulated by monovalent and divalent cations. *RNA*. 7:537–545.
- Murray, J. B., A. A. Seyhan, ..., W. G. Scott. 1998. The hammerhead, hairpin and VS ribozymes are catalytically proficient in monovalent cations alone. *Chem. Biol.* 5:587–595.
- Bai, Y., M. Greenfeld, ..., D. Herschlag. 2007. Quantitative and comprehensive decomposition of the ion atmosphere around nucleic acids. *J. Am. Chem. Soc.* 129:14981–14988.
- Grilley, D., A. M. Soto, and D. E. Draper. 2009. Direct quantitation of  $Mg^{2+}$ -RNA interactions by use of a fluorescent dye. *Methods Enzymol.* 455:71–94.
- Pabit, S. A., X. Qiu, ..., L. Pollack. 2009. Both helix topology and counterion distribution contribute to the more effective charge screening in dsRNA compared with dsDNA. *Nucleic Acids Res.* 37:3887–3896.
- Gebala, M., G. M. Giambaşu, ..., D. Herschlag. 2015. Cation-anion interactions within the nucleic acid ion atmosphere revealed by ion counting. *J. Am. Chem. Soc.* 137:14705–14715.
- Panteva, M. T., G. M. Giambaşu, and D. M. York. 2015. Force field for  $Mg^{2+}$ ,  $Mn^{2+}$ ,  $Zn^{2+}$ , and  $Cd^{2+}$  ions that have balanced interactions with nucleic acids. *J. Phys. Chem. B*. 119:15460–15470.
- Lee, T. S., B. K. Radak, ..., D. M. York. 2016. A two-metal-ion-mediated conformational switching pathway for HDV ribozyme activation. *ACS Catal.* 6:1853–1869.
- Szymanski, E. S., I. J. Kimsey, and H. M. Al-Hashimi. 2017. Direct NMR evidence that transient tautomeric and anionic states in dG•dT form Watson-Crick-like base pairs. *J. Am. Chem. Soc.* 139:4326–4329.
- Gu, X., M. T. Nguyen, ..., S. J. Schroeder. 2013. Effects of salt, polyethylene glycol, and locked nucleic acids on the thermodynamic stabilities of consecutive terminal adenosine mismatches in RNA duplexes. *J. Phys. Chem. B*. 117:3531–3540.
- Draper, D. E., D. Grilley, and A. M. Soto. 2005. Ions and RNA folding. *Annu. Rev. Biophys. Biomol. Struct.* 34:221–243.
- Panteva, M. T., G. M. Giambaşu, and D. M. York. 2015. Comparison of structural, thermodynamic, kinetic and mass transport properties of  $Mg^{2+}$  ion models commonly used in biomolecular simulations. *J. Comput. Chem.* 36:970–982.
- Misra, V. K., and D. E. Draper. 1998. On the role of magnesium ions in RNA stability. *Biopolymers*. 48:113–135.
- Draper, D. E. 2004. A guide to ions and RNA structure. *RNA*. 10:335–343.
- Misra, V. K., and D. E. Draper. 2002. The linkage between magnesium binding and RNA folding. *J. Mol. Biol.* 317:507–521.
- Juneau, K., E. Podell, ..., T. R. Cech. 2001. Structural basis of the enhanced stability of a mutant ribozyme domain and a detailed view of RNA-solvent interactions. *Structure*. 9:221–231.
- Jovine, L., S. Djordjevic, and D. Rhodes. 2000. The crystal structure of yeast phenylalanine tRNA at 2.0 Å resolution: cleavage by  $Mg^{2+}$  in 15-year old crystals. *J. Mol. Biol.* 301:401–414.
- Egli, M. 2002. DNA-cation interactions: quo vadis? *Chem. Biol.* 9:277–286.
- Bojovschi, A., M. S. Liu, and R. J. Sadus. 2014.  $Mg^{2+}$  coordinating dynamics in  $Mg$ :ATP fueled motor proteins. *J. Chem. Phys.* 140:115102.
- Grochowski, P., and J. Trylska. 2008. Continuum molecular electrostatics, salt effects, and counterion binding—a review of the Poisson-Boltzmann theory and its modifications. *Biopolymers*. 89:93–113.
- Manning, G. S. 1969. Limiting laws and counterion condensation in polyelectrolyte solutions I. Colligative properties. *J. Chem. Phys.* 51:924–933.
- Manning, G. S. 1972. On the application of polyelectrolyte “limiting laws” to the helix-coil transition of DNA. I. Excess univalent cations. *Biopolymers*. 11:937–949.

27. Manning, G. S. 1977. Limiting laws and counterion condensation in polyelectrolyte solutions. IV. The approach to the limit and the extraordinary stability of the charge fraction. *Biophys. Chem.* 7:95–102.
28. Tan, Z. J., and S. J. Chen. 2005. Electrostatic correlations and fluctuations for ion binding to a finite length polyelectrolyte. *J. Chem. Phys.* 122:44903.
29. Tan, Z. J., and S. J. Chen. 2006. Nucleic acid helix stability: effects of salt concentration, cation valence and size, and chain length. *Biophys. J.* 90:1175–1190.
30. Tan, Z. J., and S. J. Chen. 2011. Salt contribution to RNA tertiary structure folding stability. *Biophys. J.* 101:176–187.
31. Chen, S. J. 2008. RNA folding: conformational statistics, folding kinetics, and ion electrostatics. *Annu. Rev. Biophys.* 37:197–214.
32. Yu, T., Y. Zhu, ..., S. J. Chen. 2016. Predicting molecular crowding effects in ion-RNA interactions. *J. Phys. Chem. B.* 120:8837–8844.
33. Beglov, D., and B. Roux. 1997. An integral equation to describe the solvation of polar molecules in liquid water. *J. Phys. Chem. B.* 101:7821–7826.
34. Kovalenko, A., and F. Hirata. 1998. Three-dimensional density profiles of water in contact with a solute of arbitrary shape: a RISM approach. *Chem. Phys. Lett.* 290:237–244.
35. Lemkul, J. A., S. K. Lakkaraju, and A. D. MacKerell, Jr. 2016. Characterization of  $Mg^{2+}$  distributions around RNA in solution. *ACS Omega.* 1:680–688.
36. Cunha, R. A., and G. Bussi. 2017. Unraveling  $Mg^{2+}$ -RNA binding with atomistic molecular dynamics. *RNA.* 23:628–638.
37. Kirmizialtin, S., S. A. Pabit, ..., R. Elber. 2012. RNA and its ionic cloud: solution scattering experiments and atomically detailed simulations. *Biophys. J.* 102:819–828.
38. Robbins, T. J., J. D. Ziebarth, and Y. Wang. 2014. Comparison of monovalent and divalent ion distributions around a DNA duplex with molecular dynamics simulation and a Poisson-Boltzmann approach. *Biopolymers.* 101:834–848.
39. Auffinger, P., L. Bielecki, and E. Westhof. 2003. The  $Mg^{2+}$  binding sites of the 5S rRNA loop E motif as investigated by molecular dynamics simulations. *Chem. Biol.* 10:551–561.
40. Bergonzo, C., K. B. Hall, and T. E. Cheatham, III. 2015. Stem-loop V of Varkud satellite RNA exhibits characteristics of the  $Mg^{2+}$  bound structure in the presence of monovalent ions. *J. Phys. Chem. B.* 119:12355–12364.
41. Bergonzo, C., K. B. Hall, and T. E. Cheatham, III. 2016. Divalent ion dependent conformational changes in an RNA stem-loop observed by molecular dynamics. *J. Chem. Theory Comput.* 12:3382–3389.
42. Tsui, V., and D. A. Case. 2001. Calculations of the absolute free energies of binding between RNA and metal ions using molecular dynamics simulations and continuum electrostatics. *J. Phys. Chem. B.* 105:11314–11325.
43. Meisburger, S. P., S. A. Pabit, and L. Pollack. 2015. Determining the locations of ions and water around DNA from X-ray scattering measurements. *Biophys. J.* 108:2886–2895.
44. Cheatham, T. E., III, and D. A. Case. 2013. Twenty-five years of nucleic acid simulations. *Biopolymers.* 99:969–977.
45. Lee, J., X. Cheng, ..., W. Im. 2016. CHARMM-GUI input generation for NAMD, GROMACS, AMBER, OpenMM, and CHARMM/OpenMM simulations using the CHARMM additive force field. *J. Chem. Theory Comput.* 12:405–413.
46. Galindo-Murillo, R., J. C. Robertson, ..., T. E. Cheatham, III. 2016. Assessing the current state of Amber force field modifications for DNA. *J. Chem. Theory Comput.* 12:4114–4127.
47. Sun, L. Z., and S. J. Chen. 2016. Monte Carlo tightly bound ion model: predicting ion binding properties of RNA with ion correlations and fluctuations. *J. Chem. Theory Comput.* 12:3370–3381.
48. Draper, D. E. 2008. RNA folding: thermodynamic and molecular descriptions of the roles of ions. *Biophys. J.* 95:5489–5495.
49. Klein, D. J., P. B. Moore, and T. A. Steitz. 2004. The contribution of metal ions to the structural stability of the large ribosomal subunit. *RNA.* 10:1366–1379.
50. Rao, J. S., T. C. Dinadayalane, ..., G. N. Sastry. 2008. Comprehensive study on the solvation of mono- and divalent metal cations:  $Li^+$ ,  $Na^+$ ,  $K^+$ ,  $Be^{2+}$ ,  $Mg^{2+}$  and  $Ca^{2+}$ . *J. Phys. Chem. A.* 112:12944–12953.
51. Markham, G. D., J. P. Glusker, ..., C. W. Bock. 1996. Hydration energies of divalent beryllium and magnesium ions: an ab initio molecular orbital study. *J. Phys. Chem.* 100:3488–3497.
52. Hummer, G., L. R. Pratt, and A. E. Garcia. 1996. Free energy of ionic hydration. *J. Phys. Chem.* 100:1206–1215.
53. Jiao, D., C. King, ..., P. Ren. 2006. Simulation of  $Ca^{2+}$  and  $Mg^{2+}$  solvation using polarizable atomic multipole potential. *J. Phys. Chem. B.* 110:18553–18559.
54. Cramer, C. J., and D. G. Truhlar. 1992. An SCF solvation model for the hydrophobic effect and absolute free-energies of aqueous solvation. *Science.* 256:213–217.
55. Villa, A., and A. E. Mark. 2002. Calculation of the free energy of solvation for neutral analogs of amino acid side chains. *J. Comput. Chem.* 23:548–553.
56. Luo, R., L. David, and M. K. Gilson. 2002. Accelerated Poisson-Boltzmann calculations for static and dynamic systems. *J. Comput. Chem.* 23:1244–1253.
57. Shirts, M. R., J. W. Pitera, ..., V. S. Pande. 2003. Extremely precise free energy calculations of amino acid side chain analogs: comparison of common molecular mechanics force fields for proteins. *J. Chem. Phys.* 119:5740–5761.
58. Feig, M., and C. L. Brooks, III. 2004. Recent advances in the development and application of implicit solvent models in biomolecule simulations. *Curr. Opin. Struct. Biol.* 14:217–224.
59. Rizzo, R. C., T. Aynechi, ..., I. D. Kuntz. 2006. Estimation of absolute free energies of hydration using continuum methods: accuracy of partial, charge models and optimization of nonpolar contributions. *J. Chem. Theory Comput.* 2:128–139.
60. Mobley, D. L., E. Dumont, ..., K. A. Dill. 2007. Comparison of charge models for fixed-charge force fields: small-molecule hydration free energies in explicit solvent. *J. Phys. Chem. B.* 111:2242–2254.
61. Guthrie, J. P. 2009. A blind challenge for computational solvation free energies: introduction and overview. *J. Phys. Chem. B.* 113:4501–4507.
62. Kehoe, C. W., C. J. Fennell, and K. A. Dill. 2012. Testing the semi-explicit assembly solvation model in the SAMPL3 community blind test. *J. Comput. Aided Mol. Des.* 26:563–568.
63. Ou, S. C., and B. M. Pettitt. 2016. Solute–solvent energetics based on proximal distribution functions. *J. Phys. Chem. B.* 120:8230–8237.
64. Ou, S. C., J. A. Drake, and B. M. Pettitt. 2017. Nonpolar solvation free energy from proximal distribution functions. *J. Phys. Chem. B.* 121:3555–3564.
65. Hu, Y., B. Sherborne, ..., Z. Guo. 2016. The importance of protonation and tautomerization in relative binding affinity prediction: a comparison of AMBER TI and Schrödinger FEP. *J. Comput. Aided Mol. Des.* 30:533–539.
66. Freedman, H., L. P. Huynh, ..., T. N. Truong. 2010. Explicitly solvated ligand contribution to continuum solvation models for binding free energies: selectivity of theophylline binding to an RNA aptamer. *J. Phys. Chem. B.* 114:2227–2237.
67. Jorgensen, W. L., J. Chandrasekhar, ..., M. L. Klein. 1983. Comparison of simple potential function for simulating liquid water. *J. Chem. Phys.* 79:926–935.
68. Ren, P. Y., and J. W. Ponder. 2003. Polarizable atomic multipole water model for molecular mechanics simulation. *J. Phys. Chem. B.* 107:5933–5947.
69. Honig, B., and A. Nicholls. 1995. Classical electrostatics in biology and chemistry. *Science.* 268:1144–1149.

70. Onufriev, A., D. Bashford, and D. A. Case. 2000. Modification of the generalized Born model suitable for macromolecules. *J. Phys. Chem. B.* 104:3712–3720.
71. Geney, R., M. Layten, ..., C. Simmerling. 2006. Investigation of salt bridge stability in a generalized Born solvent model. *J. Chem. Theory Comput.* 2:115–127.
72. Onufriev, A., D. A. Case, and D. Bashford. 2002. Effective Born radii in the generalized Born approximation: the importance of being perfect. *J. Comput. Chem.* 23:1297–1304.
73. Boyer, R. D., and R. L. Bryan. 2012. Fast estimation of solvation free energies for diverse chemical species. *J. Phys. Chem. B.* 116:3772–3779.
74. Wang, J. M., W. Wang, ..., P. A. Kollman. 2001. Solvation model based on weighted solvent accessible surface area. *J. Phys. Chem. B.* 105:5055–5067.
75. Lazaridis, T., and M. Karplus. 1999. Effective energy function for proteins in solution. *Proteins.* 35:133–152.
76. Ooi, T., M. Oobatake, ..., H. A. Scheraga. 1987. Accessible surface areas as a measure of the thermodynamic parameters of hydration of peptides. *Proc. Natl. Acad. Sci. USA.* 84:3086–3090.
77. Eisenberg, D., and A. D. McLachlan. 1986. Solvation energy in protein folding and binding. *Nature.* 319:199–203.
78. Fennell, C. J., C. Kehoe, and K. A. Dill. 2010. Oil/water transfer is partly driven by molecular shape, not just size. *J. Am. Chem. Soc.* 132:234–240.
79. Fennell, C. J., C. W. Kehoe, and K. A. Dill. 2011. Modeling aqueous solvation with semi-explicit assembly. *Proc. Natl. Acad. Sci. USA.* 108:3234–3239.
80. Li, L., C. J. Fennell, and K. A. Dill. 2014. Field-SEA: a model for computing the solvation free energies of nonpolar, polar, and charged solutes in water. *J. Phys. Chem. B.* 118:6431–6437.
81. Purisima, E. O., and T. Sulea. 2009. Restoring charge asymmetry in continuum electrostatics calculations of hydration free energies. *J. Phys. Chem. B.* 113:8206–8209.
82. Mukhopadhyay, A., A. T. Fenley, ..., A. V. Onufriev. 2012. Charge hydration asymmetry: the basic principle and how to use it to test and improve water models. *J. Phys. Chem. B.* 116:9776–9783.
83. Humphrey, W., A. Dalke, and K. Schulten. 1996. VMD: visual molecular dynamics. *J. Mol. Graph.* 14:33–38, 27–28.
84. Rialdi, G., J. Levy, and R. Biltonen. 1972. Thermodynamic studies of transfer ribonucleic acids. I. Magnesium binding to yeast phenylalanine transfer ribonucleic acid. *Biochemistry.* 11:2472–2479.
85. Holland, J. A., M. R. Hansen, ..., D. W. Hoffman. 1999. An examination of coaxial stacking of helical stems in a pseudoknot motif: the gene 32 messenger RNA pseudoknot of bacteriophage T2. *RNA.* 5:257–271.
86. Su, L., L. Chen, ..., A. Rich. 1999. Minor groove RNA triplex in the crystal structure of a ribosomal frameshifting viral pseudoknot. *Nat. Struct. Biol.* 6:285–292.
87. MacKerell, A. D., and N. K. Banavali. 2000. All-atom empirical force field for nucleic acids: II. Application to molecular dynamics simulations of DNA and RNA in solution. *J. Comput. Chem.* 21:105–120.
88. Denning, E. J., U. D. Priyakumar, ..., A. D. Mackerell, Jr. 2011. Impact of 2'-hydroxyl sampling on the conformational properties of RNA: update of the CHARMM all-atom additive force field for RNA. *J. Comput. Chem.* 32:1929–1943.
89. Phillips, J. C., R. Braun, ..., K. Schulten. 2005. Scalable molecular dynamics with NAMD. *J. Comput. Chem.* 26:1781–1802.
90. Zwanzig, R. W. 1954. High-temperature equation of state by a perturbation method. I. Nonpolar gases. *J. Chem. Phys.* 22:1420–1426.
91. Pearlman, D. A., and P. A. Kollman. 1991. The overlooked bond-stretching contribution in free energy perturbation calculations. *J. Chem. Phys.* 94:4532–4545.
92. Straatsma, T. P., and H. J. C. Berendsen. 1988. Free energy of ionic hydration: analysis of a thermodynamic integration technique to evaluate free energy differences by molecular dynamics simulations. *J. Chem. Phys.* 89:5876–5886.
93. Zacharias, M., T. P. Straatsma, and J. A. McCammon. 1994. Separation-shifted scaling, a new scaling method for Lennard-Jones interactions in thermodynamic integration. *J. Chem. Phys.* 100:9025–9031.
94. Beutler, T. C., A. E. Mark, ..., W. F. van Gunsteren. 1994. Avoiding singularities and numerical instabilities in free energy calculations based on molecular simulations. *Chem. Phys. Lett.* 222:529–539.
95. Pitera, J. W., and W. F. van Gunsteren. 2002. A comparison of non-bonded scaling approaches for free energy calculations. *Mol. Simul.* 28:45–65.
96. Bennett, C. H. 1976. Efficient estimation of free energy differences from Monte Carlo data. *J. Comput. Phys.* 22:245–268.
97. Sun, L. Z., X. Heng, and S. J. Chen. 2017. Theory meets experiment: metal ion effects in HCV genomic RNA kissing complex formation. *Front. Mol. Biosci.* 4:92.
98. Kranawetter, C., S. Brady, ..., X. Heng. 2017. NMR study of RNA structures in the 3'-end of the Hepatitis C Virus genome. *Biochemistry.* 56:4972–4984.
99. Sun, L. Z., C. Kranawetter, ..., S. J. Chen. 2017. Predicting ion effects in an RNA conformational equilibrium. *J. Phys. Chem. B.* 121:8026–8036.

**Biophysical Journal, Volume 114**

**Supplemental Information**

**Hexahydrated  $Mg^{2+}$  Binding and Outer-Shell Dehydration on RNA  
Surface**

**Tao Yu and Shi-Jie Chen**

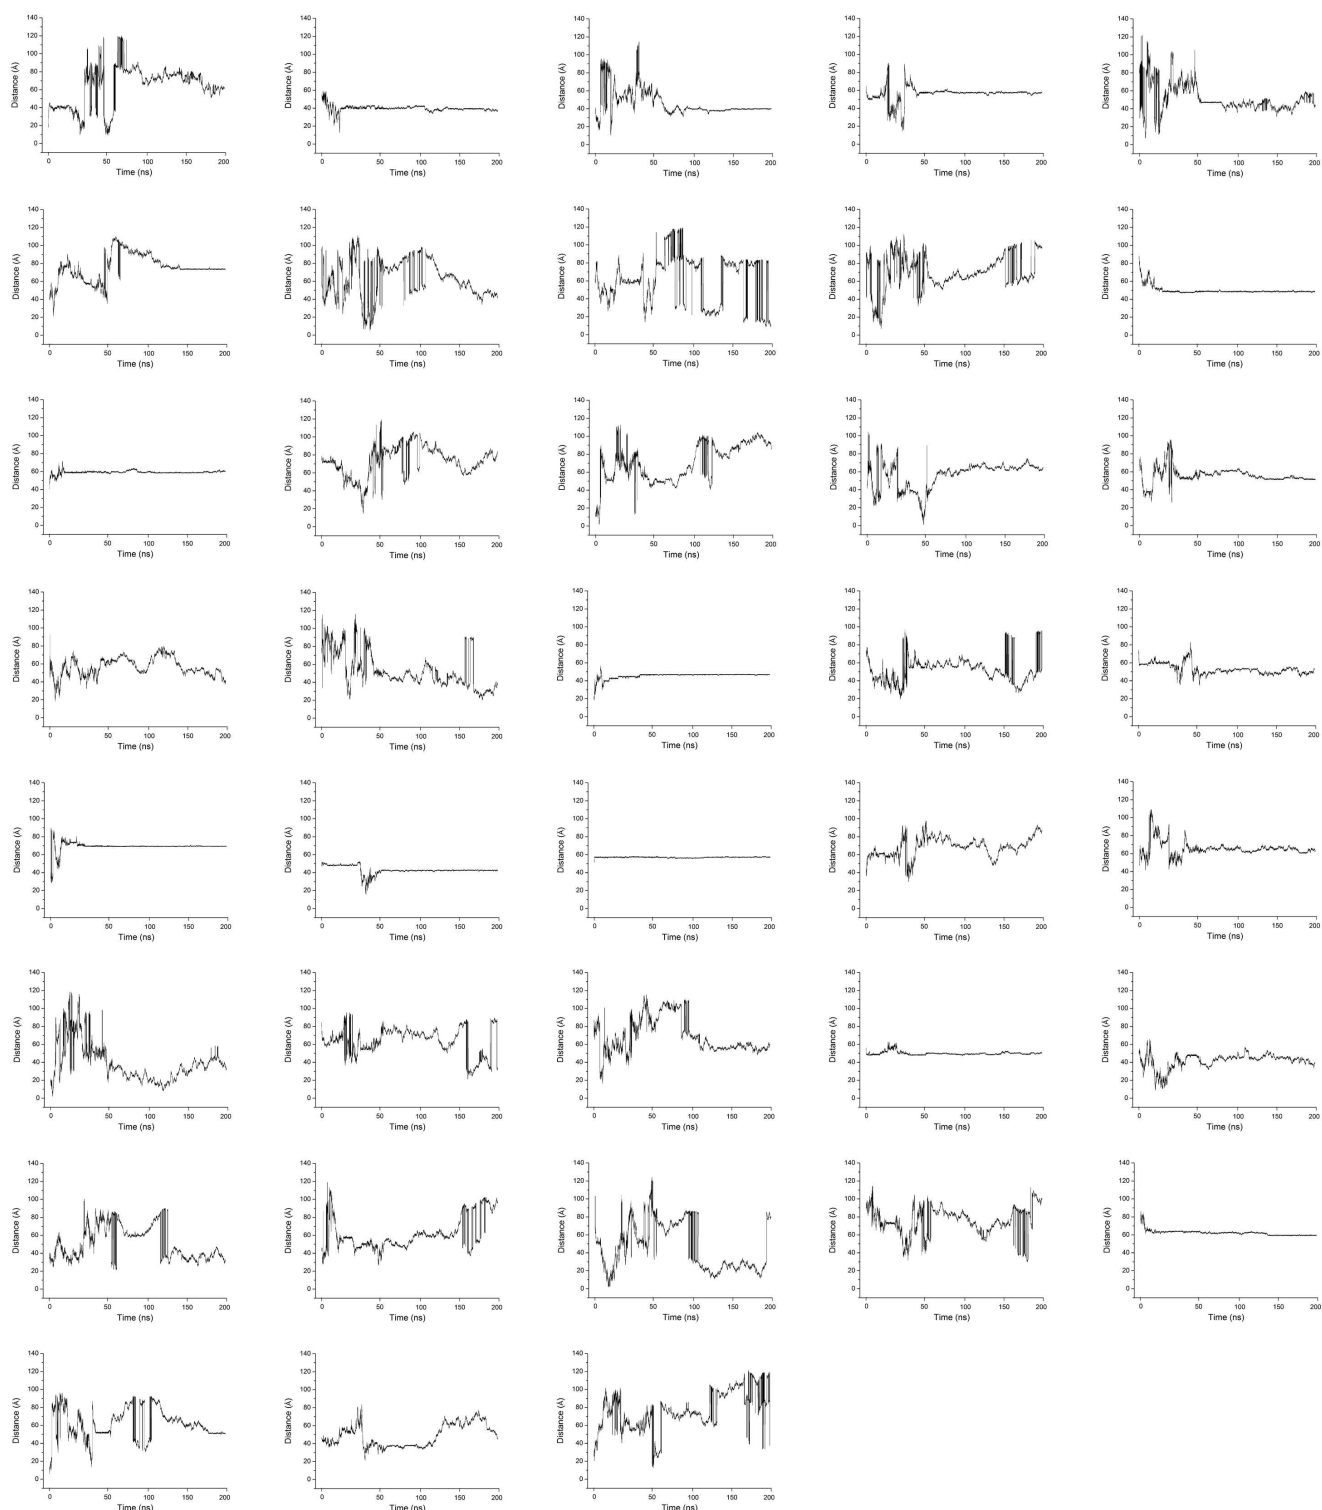

Figure S1: Coordinate variations (relative to the initial coordinates) of all the 38  $Mg^{2+}$  ions in tRNA-water-ion solution system during a 200 ns MD simulation. Small coordinate variation indicates  $Mg^{2+}$  ion binding to the tRNA surface.

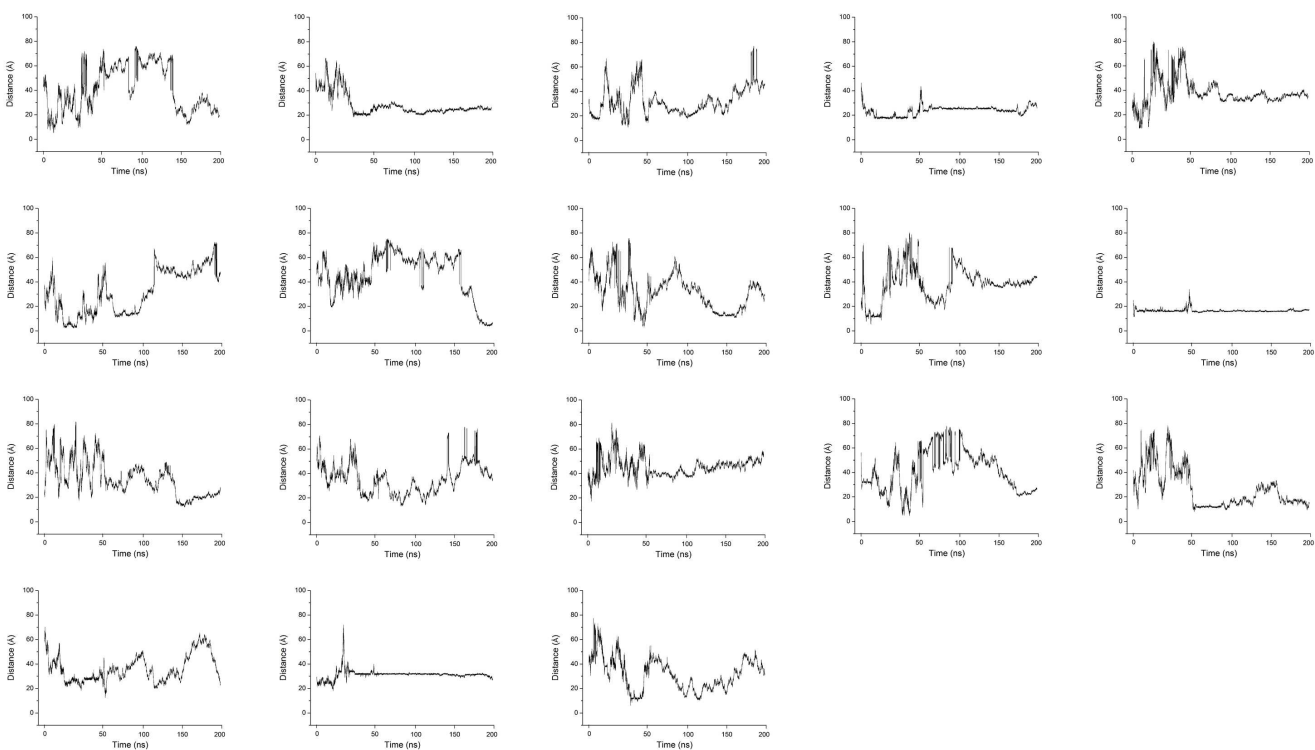

Figure S2: Coordinate variations (relative to the initial coordinates) of all 18  $Mg^{2+}$  ions in mRNA-water-ion solution system during 200 ns MD simulation. Small coordinate variation indicates  $Mg^{2+}$  ion binding to the mRNA surface.

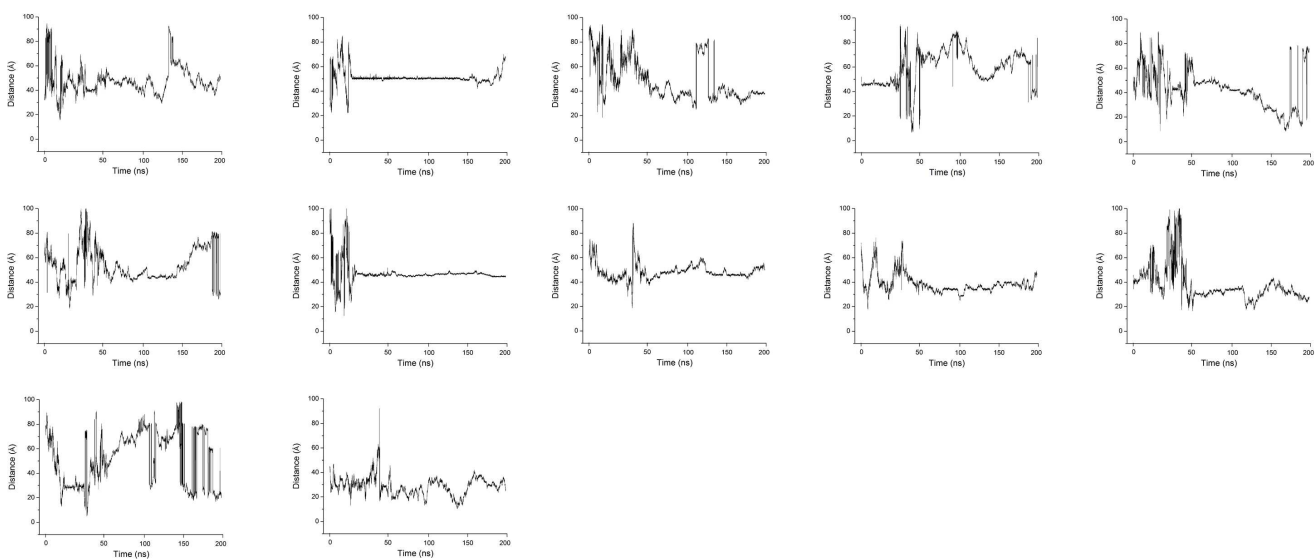

Figure S3: Coordinate variations of all the 12  $Mg^{2+}$  ions in the BWYV RNA-water-ion solution system during the 200 ns MD simulation. Small coordinate variation indicates  $Mg^{2+}$  ion binding to the BWYV RNA surface.

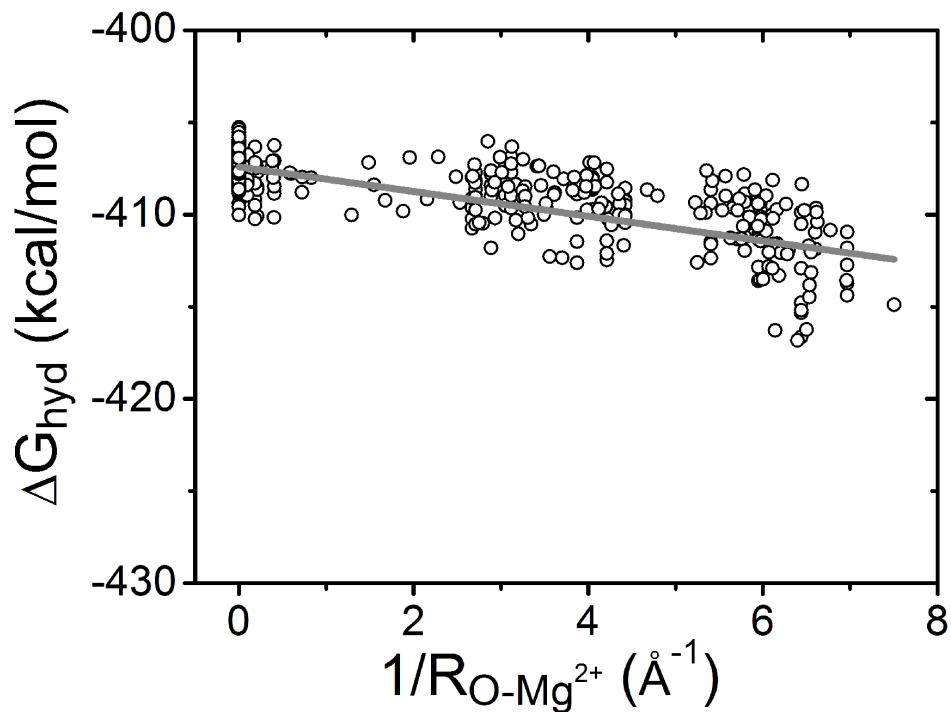

Figure S4: Relationship between the hydration free energy  $\Delta G_{hyd}$  and  $1/R_{O-Mg^{2+}}$  values of mRNA structure. The gray line is fitted by equation:  $\Delta G_{hyd} = -0.67/R_{O-Mg^{2+}} - 407.41$ .

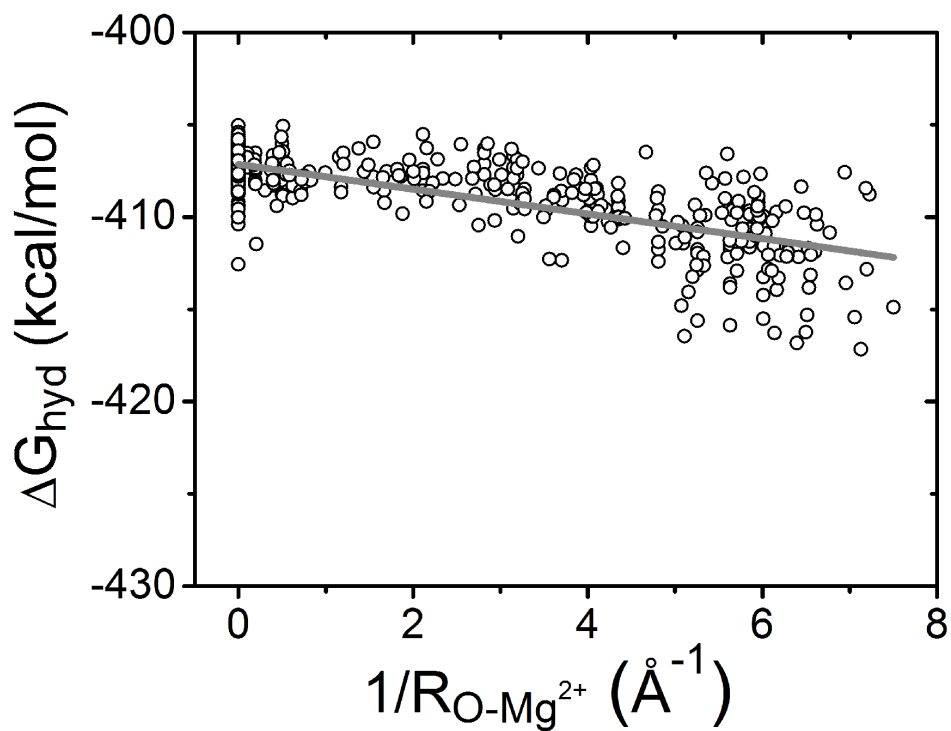

Figure S5: Relationship between the hydration free energy  $\Delta G_{hyd}$  and  $1/R_{O-Mg^{2+}}$  values of BWYV RNA structure. The gray line is fitted by equation:  $\Delta G_{hyd} = -0.67/R_{O-Mg^{2+}} - 407.26$ .

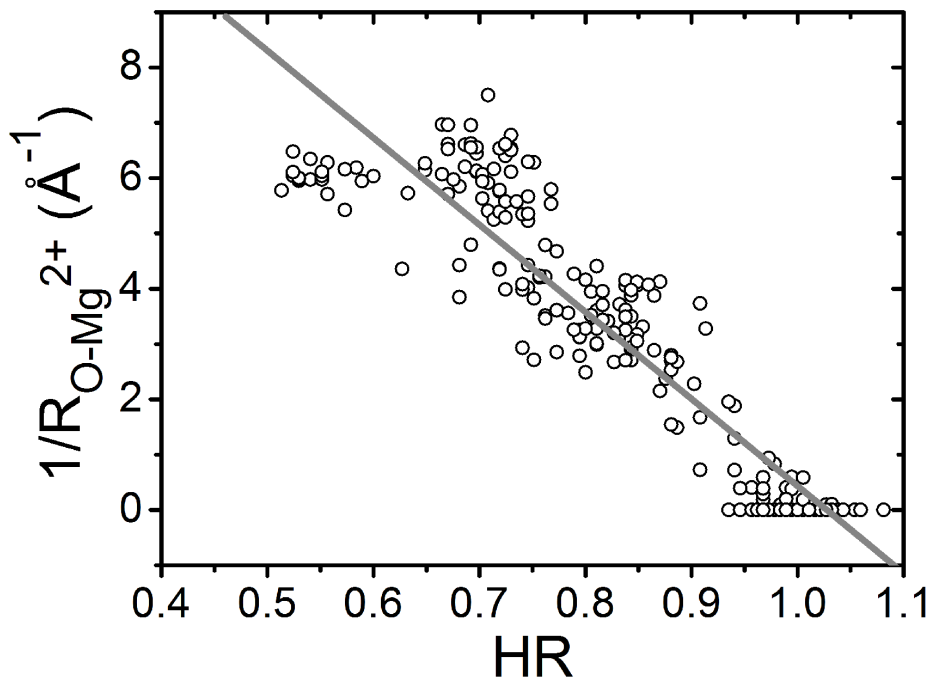

Figure S6: Relationship between  $1/R_{O-Mg^{2+}}$  values and hydration ratio (HR) of mRNA structure. The gray line is fitted by equation:  $1/R_{O-Mg^{2+}} = -15.74D_{hyd} + 16.17$ .

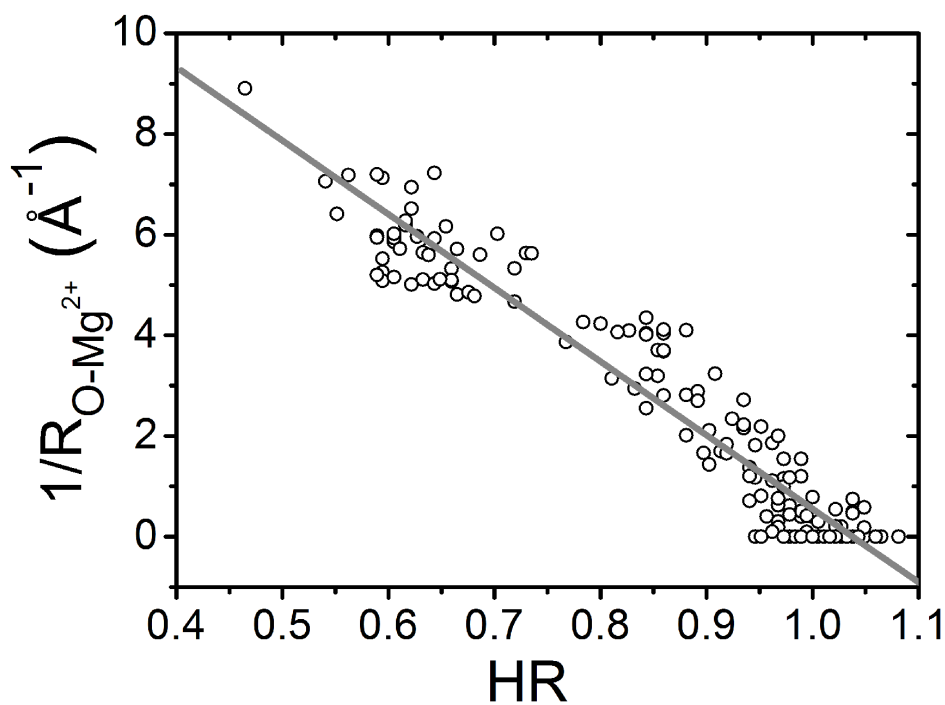

Figure S7: Relationship between  $1/R_{O-Mg^{2+}}$  values and hydration ratio (HR) of BWYV RNA structure. The gray line is fitted by equation:  $1/R_{O-Mg^{2+}} = -14.62D_{hyd} + 15.18$ .
